# Supplementary material for: Intramolecular cyclization ofN-cyano sulfoximines by N–CN bond activation
Source: Royal Society of Chemistry journal article supplement (doi:10.1039/d3ra04208a), 2023-01-01
Supplement: d3ra04208a1.pdf [file d3ra04208a1.pdf]

# Intramolecular Cyclization of *N*-Cyano Sulfoximines by N-CN Bond Activation

Ye Ji Seo,<sup>†a,b</sup> Eunsil Kim,<sup>†a,c</sup> In Seok Oh,<sup>†a,c</sup> Ji Young Hyun,<sup>a,b</sup> Ji Ho Song,<sup>a,b</sup> Hwan Jung Lim,<sup>\*a,b</sup> Seong Jun Park<sup>\*a,b</sup>

<sup>1</sup>Department of Drug Discovery, Korea Research Institute of Chemical Technology (KRICT), 141 Gajeong-ro, Yuseong-gu, Daejeon 34114, Republic of Korea

<sup>2</sup>Pharmaceutical Chemistry, University of Science & Technology, Daejeon 34113, Republic of Korea

<sup>3</sup>Department of Chemistry, Sogang University, 35 Baekbeom-ro, Mapo-gu, Seoul 04107, Republic of Korea

Email of corresponding author: Seong Jun Park – [sjunpark@kRICT.re.kr](mailto:sjunpark@kRICT.re.kr)

## Supporting information

### Contents

|                                                                                       |    |
|---------------------------------------------------------------------------------------|----|
| General method.....                                                                   | 3  |
| Experimental section.....                                                             | 4  |
| Synthesis of <i>N</i> -Cyano sulfoximines.....                                        | 4  |
| Synthetic procedure for Intramolecular cyclization .....                              | 5  |
| Synthetic procedure for Mechanism study.....                                          | 7  |
| Synthesis of compound <b>2b'</b> .....                                                | 8  |
| Unsuccessful attempts for the intramolecular cyclization of compound <b>1ac</b> ..... | 9  |
| NMR spectroscopies of Product .....                                                   | 10 |

|                                                                                                                           |    |
|---------------------------------------------------------------------------------------------------------------------------|----|
| <b>Figure S1.</b> $^1\text{H}$ and $^{13}\text{C}$ NMR spectroscopy of <b>2a</b> .....                                    | 10 |
| <b>Figure S2.</b> $^1\text{H}$ and $^{13}\text{C}$ NMR spectroscopy of <b>2b</b> .....                                    | 11 |
| <b>Figure S3.</b> $^1\text{H}$ and $^{13}\text{C}$ NMR spectroscopy of <b>2c</b> .....                                    | 12 |
| <b>Figure S4.</b> $^1\text{H}$ and $^{13}\text{C}$ NMR spectroscopy of <b>2d</b> .....                                    | 13 |
| <b>Figure S5.</b> $^1\text{H}$ and $^{13}\text{C}$ NMR spectroscopy of <b>2e</b> .....                                    | 14 |
| <b>Figure S6.</b> $^1\text{H}$ and $^{13}\text{C}$ NMR spectroscopy of <b>2b'</b> .....                                   | 15 |
| <b>Figure S7.</b> $^1\text{H}$ and $^{13}\text{C}$ NMR spectroscopy of sulfilimine of [ $^{13}\text{C}$ ] <b>1a</b> ..... | 16 |
| <b>Figure S7-1.</b> $^1\text{H}$ and $^{13}\text{C}$ NMR spectroscopy of [ $^{13}\text{C}$ ] <b>1a</b> .....              | 17 |
| <b>Figure S8.</b> $^1\text{H}$ and $^{13}\text{C}$ NMR spectroscopy of [ $^{13}\text{C}$ ] <b>2a</b> .....                | 18 |
| <b>Figure S9.</b> $^1\text{H}$ and $^{13}\text{C}$ NMR spectroscopy of <b>1ac</b> .....                                   | 19 |
| Time-resolved NMR spectroscopy .....                                                                                      | 20 |
| LC/MS analyses of reaction intermediates <b>1ad</b> .....                                                                 | 21 |
| Chemical Analysis Report for X-ray crystallography.....                                                                   | 22 |
| 1 Sample Information.....                                                                                                 | 22 |
| 2 Instrument Information.....                                                                                             | 23 |
| 2.1 Instrument .....                                                                                                      | 23 |
| 2.2 Software.....                                                                                                         | 23 |
| 3 X-ray Crystallographic Results.....                                                                                     | 24 |
| 3.1 X-ray Crystallographic Data.....                                                                                      | 24 |
| 3.2 X-ray Crystallographic Structure.....                                                                                 | 35 |
| The ADMET predicted data of compound <b>2c</b> and <b>2d</b> by the KRICT AI platform .....                               | 40 |

## General method

Analytical thin-layer chromatography (TLC) was performed on Kieselgel 60 F254 glass plates precoated with a 0.2 mm thickness of silica gel. The TLC plates were visualized by UV (254 nm) Flash chromatography was carried out with Kieselgel 60 (230–400 mesh) on a silica gel. Melting points: Barnstead/Electrothermal 9300, measurements were performed in open glass capillaries. NMR spectra: Bruker AV 300 MHz ( $^1\text{H}$  NMR: 300 MHz,  $^{13}\text{C}$  NMR: 75 MHz), AV 400 MHz ( $^1\text{H}$  NMR: 400 MHz,  $^{13}\text{C}$  NMR: 100 MHz), AV 500 MHz ( $^1\text{H}$  NMR: 500 MHz,  $^{13}\text{C}$  NMR: 125 MHz), and AV2 500 MHz ( $^{19}\text{F}$  NMR: 470 MHz), and the spectra were recorded in  $\text{CDCl}_3$ , MeOD, and DMSO- $d_6$  using TMS as internal standard and are reported in ppm.  $^1\text{H}$  NMR data are reported as follows: [s = singlet, d = doublet, t = triplet, q = quartet, dd = doublet of doublet, td = doublet of triplet, and m = multiplet; coupling constant(s)  $J$  is given in Hz; integration, proton assignment]. High-resolution mass spectra (HRMS): JEOL JMS-700. X-ray crystallography: Bruker SMART APEX II X-ray diffractometer. All solvents were purified using the column filter solvent purification system before use unless otherwise indicated. Reagents were purchased and used without further purification.

## Experimental section

### Synthesis of *N*-Cyano sulfoximines

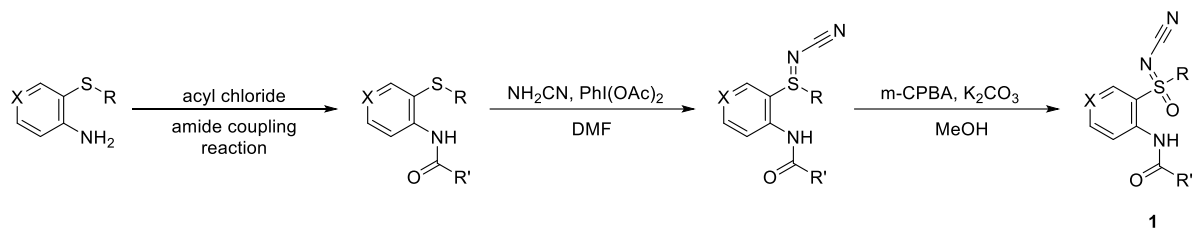

|           | X | R  | R'                                                                                    |
|-----------|---|----|---------------------------------------------------------------------------------------|
| <b>1a</b> | C | Me | 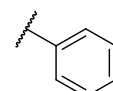   |
| <b>1b</b> | C | Ph |   |
| <b>1c</b> | N | Me |  |
| <b>1d</b> | C | Me |  |
| <b>1e</b> | C | Me |  |

For the preparation of *N*-Cyano sulfoximine **1**, please see our previous publication (*ACS Omega*, **2022**, 7, 2160-2169).

### Synthetic procedure for Intramolecular cyclization

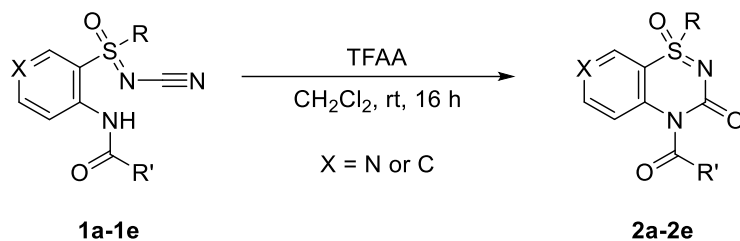

A solution of an sulfoximine **1** (50 mg) was then re-dissolved in 3 mL dry CH<sub>2</sub>Cl<sub>2</sub> and added dropwise to trifluoroacetic anhydride (6 eq) at 0 °C. After stirring for 16 hours at ambient temperature, the reaction mixture was extracted with EtOAc and washed with brine. The organic layer was dried over MgSO<sub>4</sub>, filtered and concentrated under reduced pressure. The residue was purified by flash chromatography on a silica gel (EtOAc/hexane = 2:1) to give the desired product **2**.

4-benzoyl-1-methyl-1λ<sup>4</sup>-benzo[e][1,2,4]thiadiazin-3(4*H*)-one 1-oxide (**2a**).

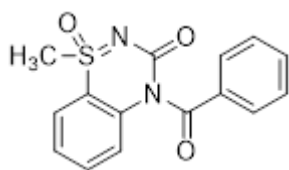

Following the general oxidation method, the reaction of *N*-(2-(*N*-cyano-*S*-methylsulfonimidoyl)-phenyl)benzamide **1a** (50 mg, 0.17 mmol) with trifluoroacetic anhydride (0.14 mL, 1.0 mmol) in CH<sub>2</sub>Cl<sub>2</sub> (3 mL) gives the desired Thiadiazinone 1-oxide **2a** as a white solid (36 mg, 89% yield). m.p 149–150 °C; <sup>1</sup>H NMR (500 MHz, CDCl<sub>3</sub>) : δ 8.00–7.98 (m, 2H), 7.85 (dd, J = 1.5 Hz, J = 8.0 Hz, 1H), 7.67–7.64 (m, 1H), 7.67–7.57 (m, 1H), 7.52–7.48 (m, 2H), 7.35–7.31 (m, 1H), 7.06–7.04 (m, 1H) 3.56 (s, 3H); <sup>13</sup>C NMR (100 MHz, CDCl<sub>3</sub>) : δ 171.1, 149.1, 138.3, 136.1, 135.0, 132.6, 130.5, 129.3, 125.2, 124.0, 116.5, 114.0, 46.0; HRMS (EI): calcd for C<sub>15</sub>H<sub>12</sub>N<sub>2</sub>O<sub>3</sub>S [M<sup>+</sup>] 300.0569; found, 300.0563.

4-benzoyl-1-phenyl-1λ<sup>4</sup>-benzo[e][1,2,4]thiadiazin-3(4*H*)-one 1-oxide (**2b**).

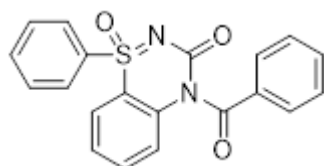

Following the general oxidation method, the reaction of *N*-(2-(*N*-cyanophenylsulfonimidoyl)-phenyl)benzamide **1b** (50 mg, 0.14 mmol) with trifluoroacetic anhydride (0.12 mL, 0.83 mmol) in CH<sub>2</sub>Cl<sub>2</sub> (3 mL) gives the desired Thiadiazinone 1-oxide **2b** as a Yellow solid (39 mg, 78% yield). m.p 129–130 °C; <sup>1</sup>H NMR (300 MHz, CDCl<sub>3</sub>) : δ 8.10–8.04 (m, 4H), 7.78–7.73 (m, 1H), 7.70–7.64 (m, 3H), 7.56–7.47 (m, 3H), 7.44–7.41 (m, 1H), 7.19–7.13 (m, 1H), 7.07 (d, J = 8.6 Hz 1H); <sup>13</sup>C NMR (100 MHz, DMSO) : δ 167.8, 150.8, 140.2, 139.5, 136.1, 135.0, 133.3, 131.2, 130.4, 129.7, 129.0, 128.6, 126.0, 123.3, 117.1, 113.5.

4-benzoyl-1-methyl-1 $\lambda^4$ -pyrido[4,3-*e*][1,2,4]thiadiazin-3(4*H*)-one 1-oxide (**2c**).

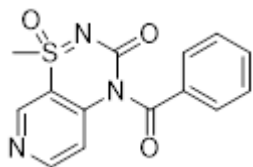

Following the general oxidation method, the reaction of *N*-(3-(*N*-cyano-*S*-methylsulfonimidoyl)-pyridin-4-yl)benzamide **1c** (50 mg, 0.17 mmol) with trifluoroacetic anhydride (0.14 mL, 1.0 mmol) in CH<sub>2</sub>Cl<sub>2</sub> (3 mL) gives the desired Thiadiazinone 1-oxide **2c** as a white solid (31 mg, 62% yield). m.p 249-250 °C; <sup>1</sup>H NMR (300 MHz, CDCl<sub>3</sub>) : δ 9.09 (s, 1H), 8.62 (d, *J* = 6.1 Hz, 1H), 7.96 (d, *J* = 7.4 Hz, 2H), 7.70 (t, *J* = 7.6 Hz, 1H), 7.53 (t, *J* = 7.7 Hz, 2H), 6.99 (d, *J* = 6.1 Hz, 1H), 3.67 (s, 3H); <sup>13</sup>C NMR (100 MHz, DMSO) : δ 170.9, 155.4, 148.4, 148.0, 143.7, 136.0, 132.3, 130.8, 130.0, 111.9, 110.0, 45.0; HRMS (EI): calcd for C<sub>14</sub>H<sub>11</sub>N<sub>3</sub>O<sub>3</sub>S, 301.0521; found, 301.0515.

4-(6-chloronicotinoyl)-1-methyl-1 $\lambda^4$ -benzo[*e*][1,2,4]thiadiazin-3(4*H*)-one 1-oxide (**2d**).

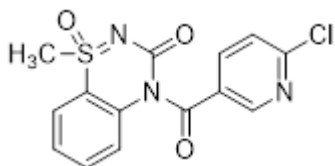

Following the general oxidation method, the reaction of 6-chloro-*N*-(2-(*N*-cyano-*S*-methyl-sulfonimidoyl)phenyl)nicotinamide **1d** (50 mg, 0.15 mmol) with trifluoroacetic anhydride (0.13 mL, 0.90 mmol) in CH<sub>2</sub>Cl<sub>2</sub> (3 mL) gives the desired Thiadiazinone 1-oxide **2d** as a white solid (44 mg, 88% yield). m.p 121-122 °C; <sup>1</sup>H NMR (300 MHz, CDCl<sub>3</sub>) : δ 8.93 (d, *J* = 2.5 Hz, 1H), 8.16 (dd, *J* = 2.5 Hz, *J* = 8.4 Hz, 1H), 7.87 (d, *J* = 8.0 Hz, 1H), 7.66 (t, *J* = 8.1 Hz, 1H), 7.47 (d, *J* = 8.4 Hz, 1H), 7.40 (t, *J* = 7.7 Hz, 1H), 7.23 (d, *J* = 7.7 Hz, 1H), 3.57 (s, 3H); <sup>13</sup>C NMR (100 MHz, CDCl<sub>3</sub>) : δ 169.5, 156.9, 151.4, 149.2, 139.7, 137.7, 136.3, 128.4, 125.2, 124.9, 124.8, 117.0, 115.1, 45.7; HRMS (EI): calcd for C<sub>14</sub>H<sub>10</sub>ClN<sub>3</sub>O<sub>3</sub>S [M<sup>+</sup>] 335.0131; found, 335.0131.

4-(4-methoxybenzoyl)-1-methyl-1 $\lambda^4$ -benzo[*e*][1,2,4]thiadiazin-3(4*H*)-one 1-oxide (**2e**).

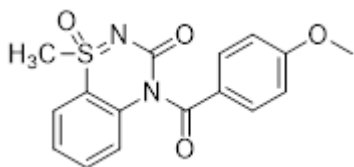

Following the general oxidation method, the reaction of *N*-(2-(*N*-cyano-*S*-methyl-sulfonimidoyl)phenyl)-4-methoxybenzamide **1e** (50 mg, 0.15 mmol) with trifluoroacetic anhydride (0.13 mL, 0.9 mmol) in CH<sub>2</sub>Cl<sub>2</sub> (3 mL) gives the desired Thiadiazinone 1-oxide **2e** as a white solid (33 mg, 66% yield). m.p 262-263 °C; <sup>1</sup>H NMR (300 MHz, CDCl<sub>3</sub>) : δ 7.96 (d, *J* = 8.9 Hz, 2H), 7.83 (dd, *J* = 1.5 Hz, *J* = 8.0 Hz, 1H), 7.60–7.54 (m, 1H), 7.30 (t, *J* = 8.2 Hz, 1H), 7.00–6.94 (m, 3H), 3.88 (s, 3H), 3.55 (s, 3H); <sup>13</sup>C NMR (100 MHz, CDCl<sub>3</sub>) : δ 169.9, 165.4, 149.0, 138.7, 136.1, 133.4, 125.3, 125.1, 123.9, 116.7, 114.8, 113.9, 55.9, 46.3; HRMS (EI): calcd for C<sub>16</sub>H<sub>14</sub>N<sub>2</sub>O<sub>4</sub>S [M<sup>+</sup>] 330.0674; found, 330.0671.

## Synthetic procedure for Mechanism study

### 4-benzoyl-1-methyl-1 $\lambda^4$ -benzo[e][1,2,4]thiadiazin-3(4*H*)-one-3- $^{13}\text{C}$ 1-oxide ( $^{13}\text{C}$ **2a**)

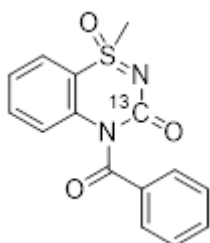

A solution of *N*-(2-(*N*-(cyano- $^{13}\text{C}$ )-*S*-methylsulfonimidoyl)phenyl)benzamide [ $^{13}\text{C}$  **1a**] (50 mg, 0.17 mmol) in  $\text{CH}_2\text{Cl}_2$  (3.0 mL) was added trifluoroacetic anhydride (0.14 mL, 1.0 mmol) at 0 °C. After stirring for 40 mins at ambient temperature, the reaction mixture was extracted with EtOAc and washed with brine. The organic layer was dried over  $\text{MgSO}_4$ , filtered and concentrated under reduced pressure. The residue was purified by flash chromatography on a silica gel (EtOAc/hexane = 2:1) to give the desired compound [ $^{13}\text{C}$  **2a**] as a white solid (42 mg, 83% yield). m.p. 149-150 °C;  $^1\text{H}$  NMR (400 MHz,  $\text{CDCl}_3$ ):  $\delta$  7.97 (d,  $J$  = 7.8 Hz, 2H), 7.85 (d,  $J$  = 7.9 Hz, 1H), 7.64 (t,  $J$  = 7.3 Hz, 1H), 7.57 (t,  $J$  = 8.6 Hz, 1H), 7.49 (t,  $J$  = 7.8 Hz, 2H), 7.32 (t,  $J$  = 8.1 Hz, 1H), 7.02 (d,  $J$  = 8.6 Hz, 1H) 3.55 (s, 3H);  $^{13}\text{C}$  NMR (100 MHz,  $\text{CDCl}_3$ ):  $\delta$  171.1, 149.0, 138.4 (d,  $J$  = 1.6 Hz), 136.1, 135.0, 132.6, 130.5, 129.3, 125.2, 124.0, 116.6 (d,  $J$  = 2.7 Hz), 114.0 (d,  $J$  = 3.7 Hz), 46.0 (d,  $J$  = 2.3 Hz,  $\text{CH}_3$ ); HRMS (EI): calcd for  $^{12}\text{C}_{14}^{13}\text{CH}_{12}\text{N}_2\text{O}_3\text{S}$  [ $\text{M}^+$ ] 301.0602; found, 301.0607.

### *N*-(2-(*S*-methyl-*N*-(2,2,2-trifluoroacetyl)sulfonimidoyl)phenyl)benzamide (**1ac**)

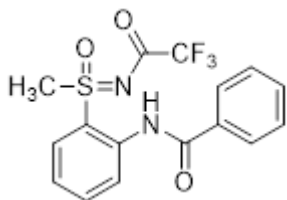

A solution of *N*-(2-(*N*-cyano-*S*-methylsulfonimidoyl)phenyl)benzamide [ $^{13}\text{C}$  **1a**] (50 mg, 0.17 mmol) in  $\text{CH}_2\text{Cl}_2$  (3.0 mL) was added trifluoroacetic anhydride (0.14 mL, 1.0 mmol) at -20 °C. The reaction mixture was stirred at -20 °C to -10 °C for 40 min and quenched with water. The reaction mixture was extracted with EtOAc and washed with brine. The organic layer was dried over  $\text{MgSO}_4$ , filtered and concentrated under reduced pressure. The residue was purified by flash chromatography on a silica gel (EtOAc/hexane = 1:2) to give the desired compound as a white solid (24.6 mg, 40% yield). m.p. 115-116 °C;  $^1\text{H}$  NMR (500 MHz,  $\text{CDCl}_3$ ):  $\delta$  10.05 (s, 1H), 8.61 (d,  $J$  = 11.3 Hz, 1H), 7.99-7.93 (m, 3H) 7.82-7.76 (m, 1H), 7.65-7.59 (m, 1H), 7.57-7.50 (m, 2H), 7.43-7.37 (m, 1H), 3.52 (s, 3H);  $^{13}\text{C}$  NMR (100 MHz,  $\text{CDCl}_3$ ):  $\delta$  165.4, 164.7, 164.3, 164.0, 163.6, 137.7, 136.4, 133.2, 133.0, 129.1, 128.6, 127.3, 125.0, 124.8, 123.7, 120.1, 117.2, 114.4, 111.5, 43.5;  $^{19}\text{F}$  NMR (376 MHz,  $\text{CDCl}_3$ ): -75.6; HRMS (EI): calcd for  $\text{C}_{16}\text{H}_{13}\text{F}_3\text{N}_2\text{O}_3\text{S}$  [ $\text{M}^+$ ] 370.0599; found, 370.0607.

## Synthesis of compound **2b'**

*N*-(2-(*S*-methyl-*N*-(2,2,2-trifluoroacetyl)sulfonimidoyl)phenyl)benzamide (**2b'**).

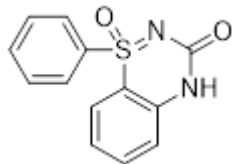

A solution of 4-benzoyl-1-phenyl-1 $\lambda^4$ -benzo[e][1,2,4]thiadiazin-3(4*H*)-one 1-oxide **2b** (10.0 mg, 0.028 mmol) in EtOH (1.0 mL) was added 1 N sodium hydroxide (0.5 mL) at rt. The reaction mixture was stirred at rt for overnight and quenched with water and saturated ammonium chloride. The reaction mixture was extracted with EtOAc and washed with brine. The organic layer was dried over MgSO<sub>4</sub>, filtered and concentrated under reduced pressure. The residue was purified by flash chromatography on a silica gel (EtOAc/hexane = 2:1) to give the desired compound as a white solid (3.0 mg, 41% yield). m.p 205-206 °C; <sup>1</sup>H NMR (400 MHz, CDCl<sub>3</sub>) :  $\delta$  11.48 (s, 1H), 8.00-7.97 (m, 2H), 7.70-7.65 (m, 1H) 7.62-7.58 (m, 2H), 7.53-7.49 (m, 1H), 7.37-7.32 (m, 2H), 7.09-7.05 (m, 1H); <sup>13</sup>C NMR (100 MHz, CDCl<sub>3</sub>) :  $\delta$  153.9, 139.6, 139.3, 135.4, 134.3, 129.5, 128.4, 125.5, 123.4, 117.8, 113.5; HRMS (EI): calcd for C<sub>8</sub>H<sub>8</sub>N<sub>2</sub>O<sub>2</sub>S [M<sup>+</sup>] 196.0306; found, 196.0298.



Unsuccessful attempts for the intramolecular cyclization of compound **1ac**

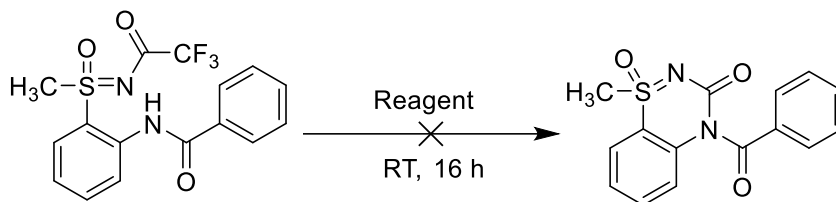

| Entry | Reagent                          | Solvent                         | Yield, %       |
|-------|----------------------------------|---------------------------------|----------------|
| 1     | K <sub>2</sub> CO <sub>3</sub>   | CH <sub>2</sub> Cl <sub>2</sub> | - <sup>a</sup> |
| 2     | K <sub>2</sub> CO <sub>3</sub>   | MeOH                            | - <sup>a</sup> |
| 3     | K <sub>2</sub> CO <sub>3</sub>   | DMF                             | - <sup>a</sup> |
| 4     | NaH                              | DMF                             | - <sup>a</sup> |
| 5     | Sodium trifluoroacetate          | CH <sub>2</sub> Cl <sub>2</sub> | - <sup>a</sup> |
| 6     | 2,2,2-trifluoroacetyl isocyanate | CH <sub>2</sub> Cl <sub>2</sub> | - <sup>a</sup> |
| 7     | Trifluoroacetic anhydride        | CH <sub>2</sub> Cl <sub>2</sub> | - <sup>a</sup> |
| 8     | PIDA, DMF                        | DMF                             | - <sup>a</sup> |
| 9     | PIFA, DMF                        | DMF                             | - <sup>a</sup> |
| 10    | HCl in dioxane (4N)              | CH <sub>2</sub> Cl <sub>2</sub> | - <sup>a</sup> |
| 11    | 2,2,2-trifluoroacetic acid       | CH <sub>2</sub> Cl <sub>2</sub> | - <sup>a</sup> |

<sup>a</sup>No reaction

# NMR spectroscopies of Product

Figure S1.  $^1\text{H}$  and  $^{13}\text{C}$  NMR spectroscopy of **2a**

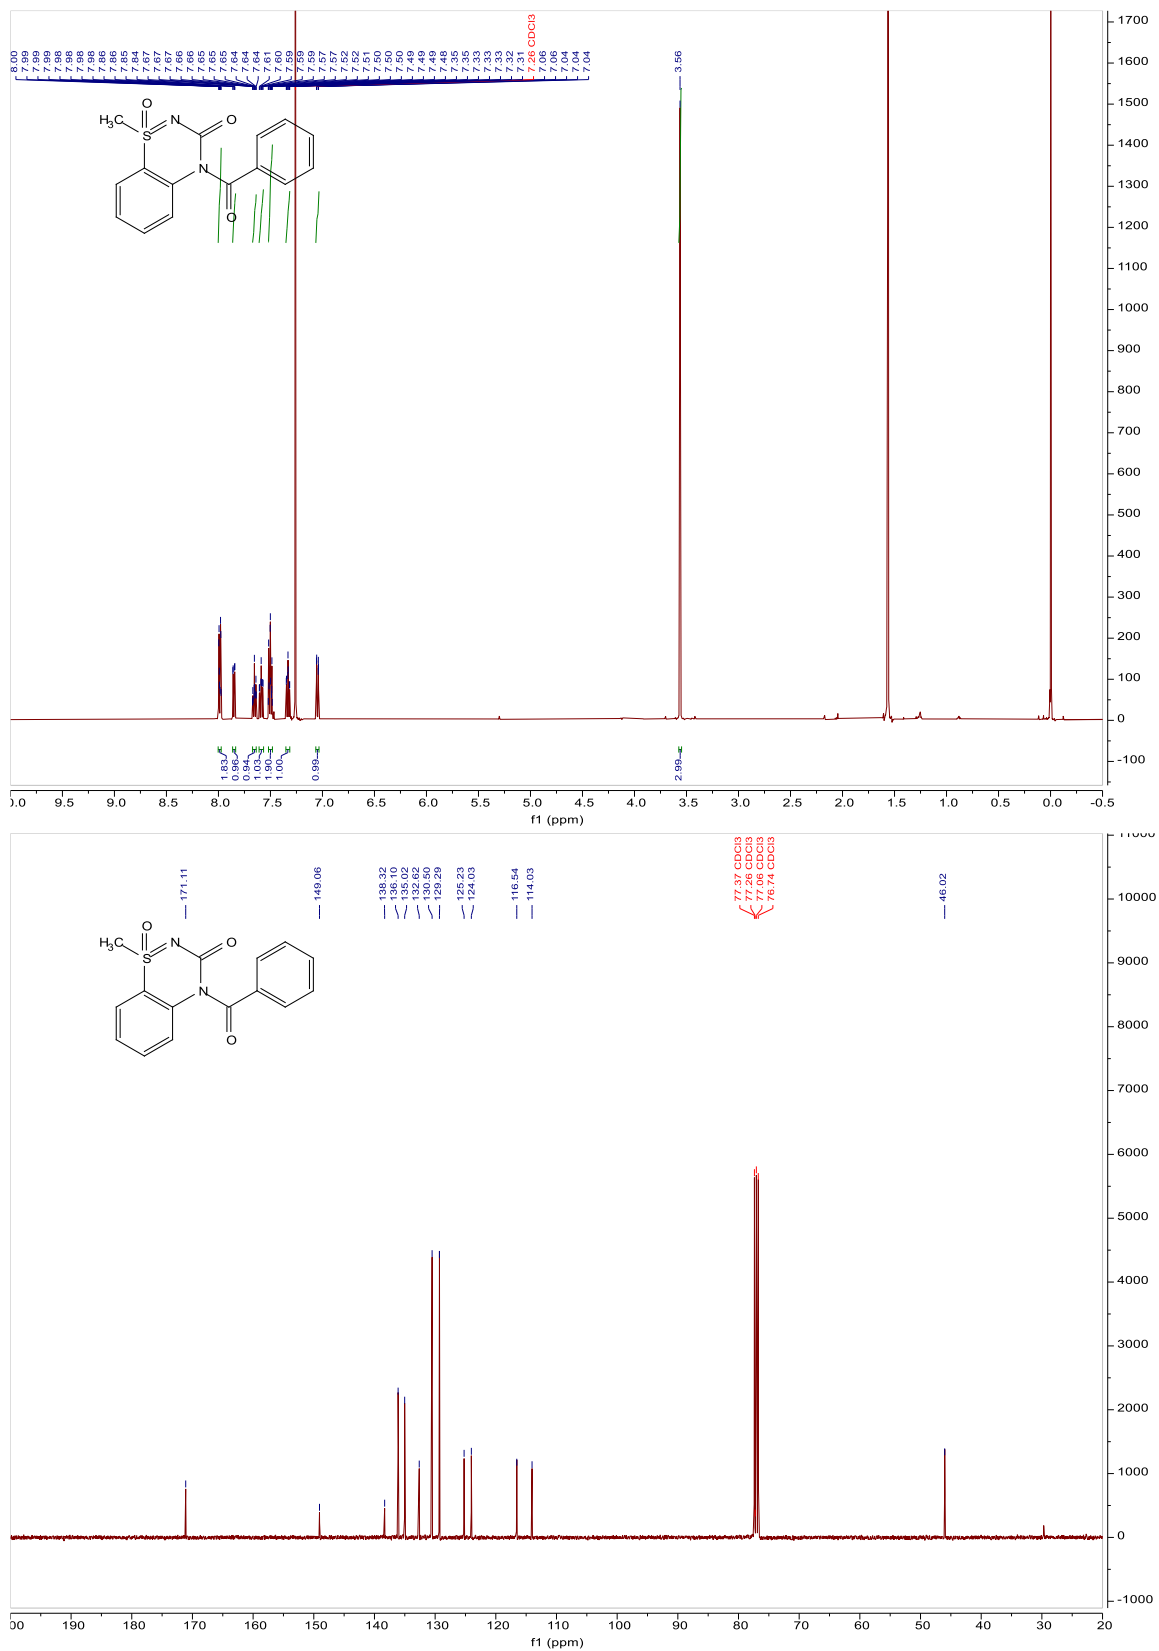

Figure S2. <sup>1</sup>H and <sup>13</sup>C NMR spectroscopy of **2b**

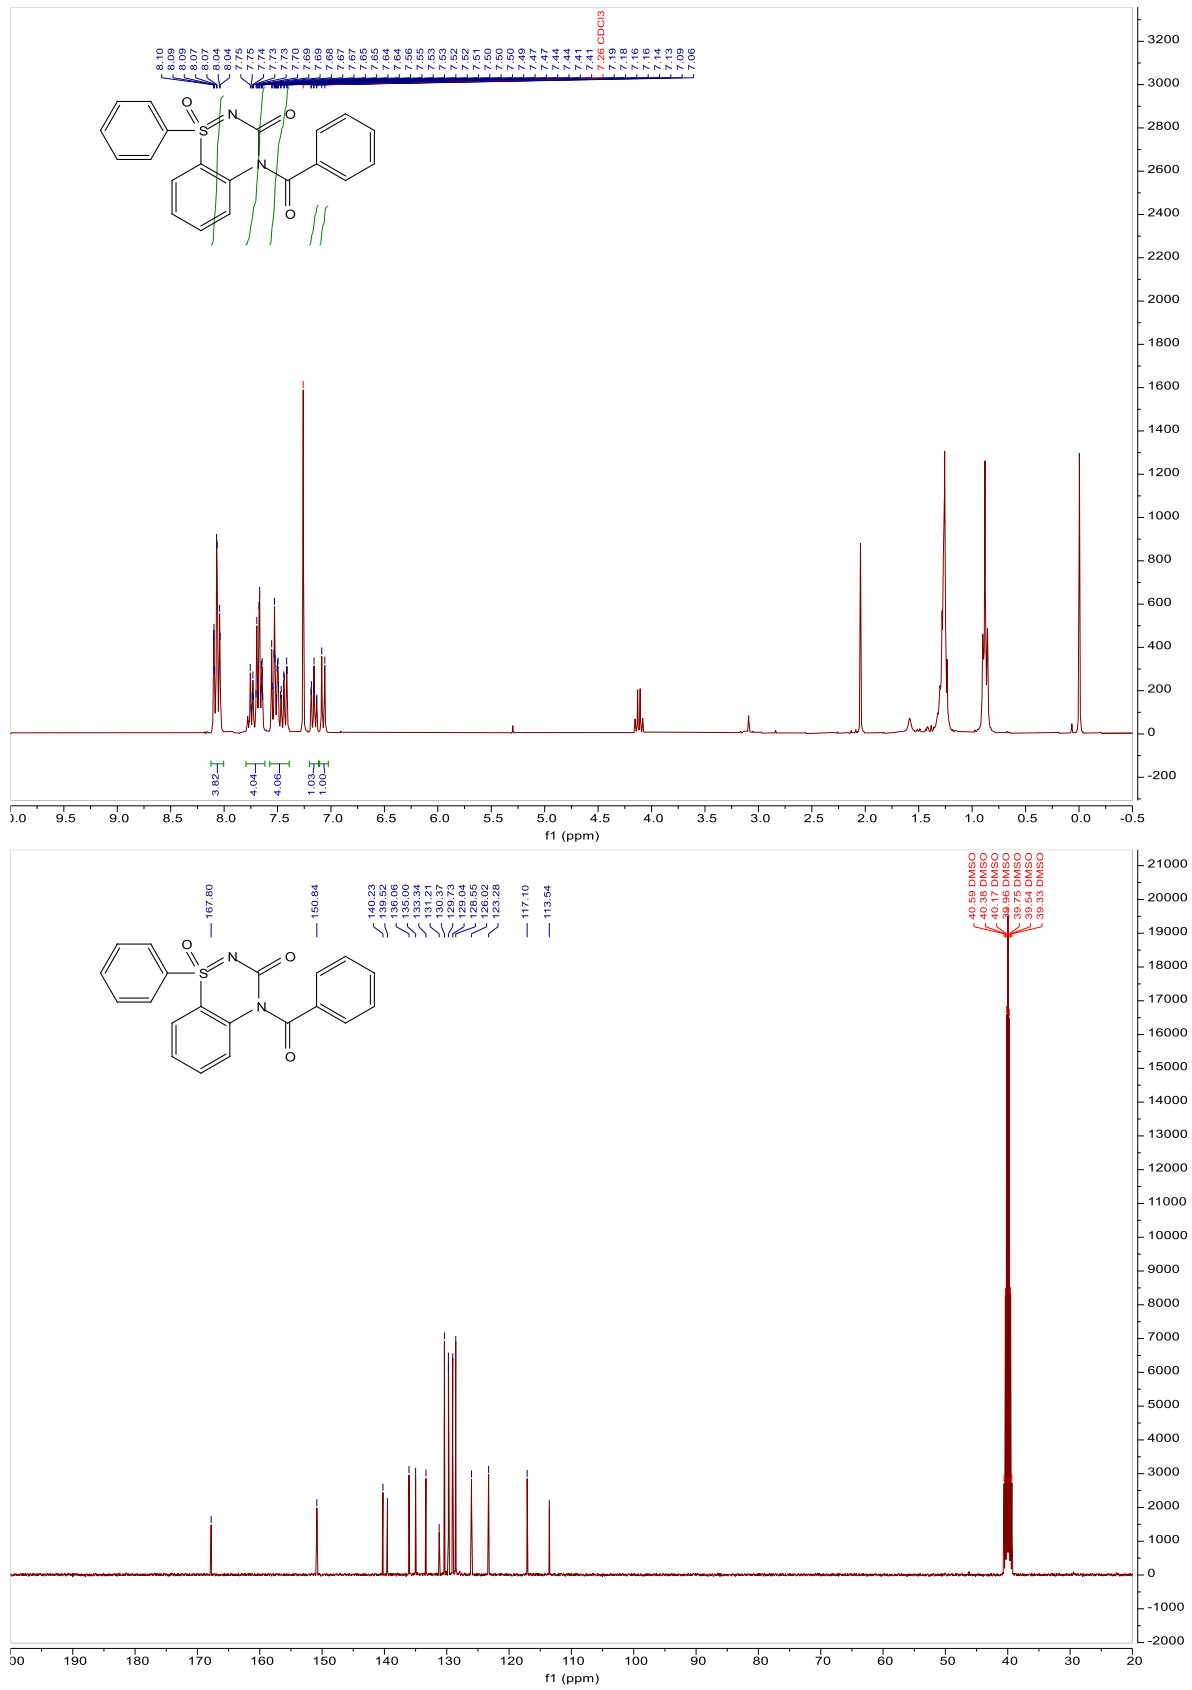

Figure S3. <sup>1</sup>H and <sup>13</sup>C NMR spectroscopy of 2c

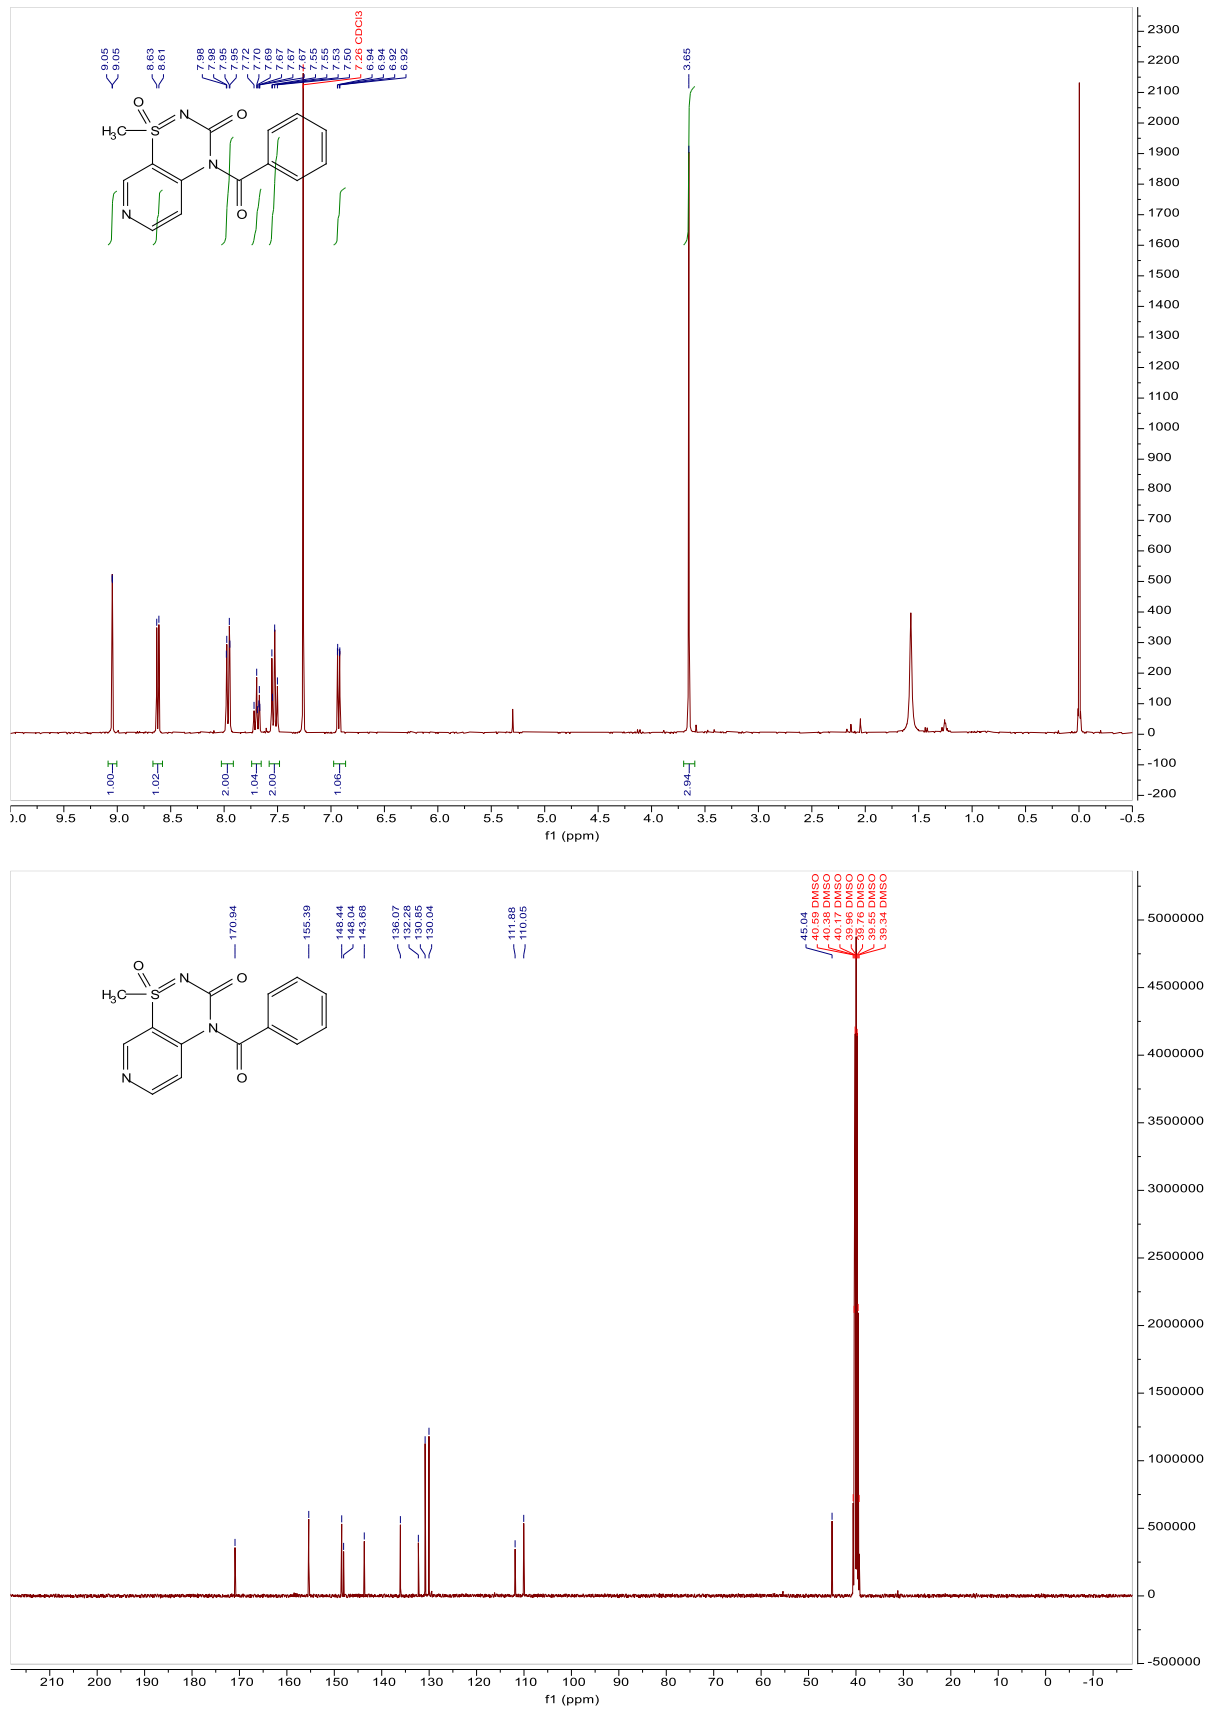

Figure S4.  $^1\text{H}$  and  $^{13}\text{C}$  NMR spectroscopy of **2d**

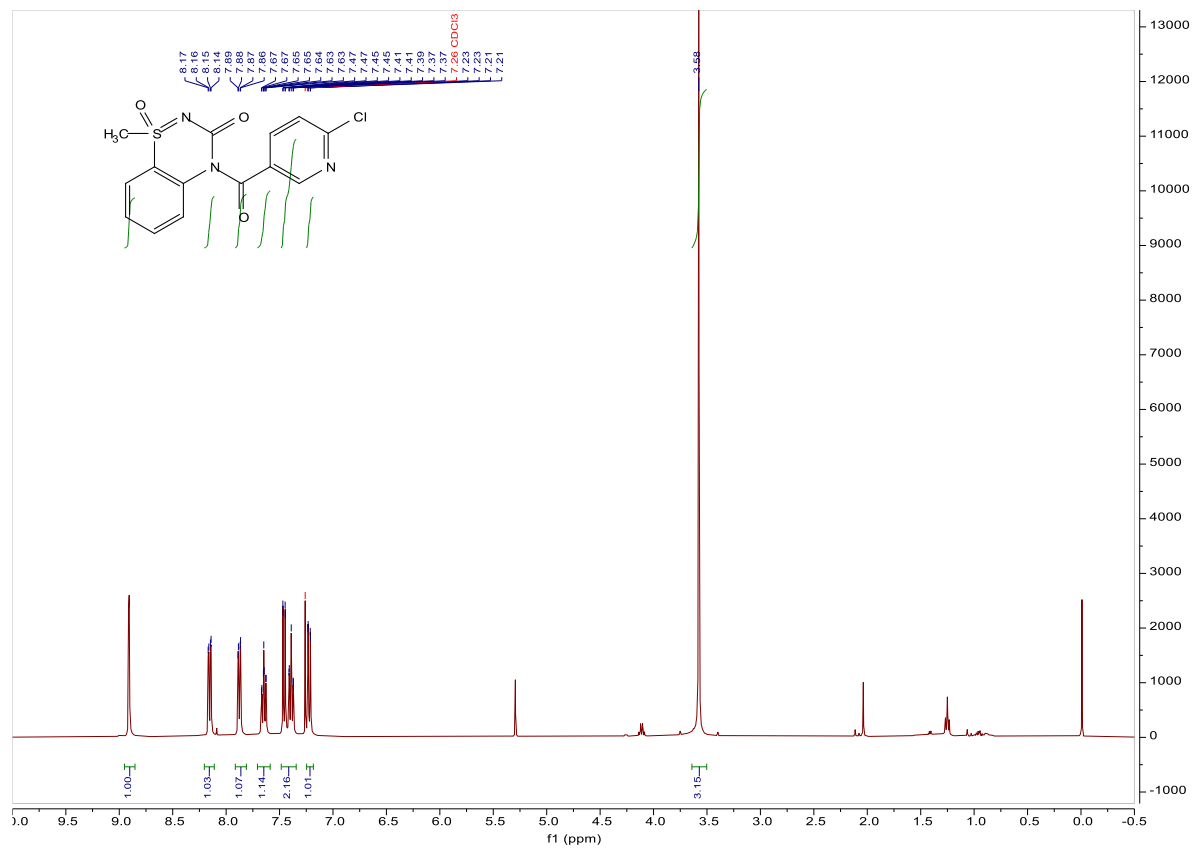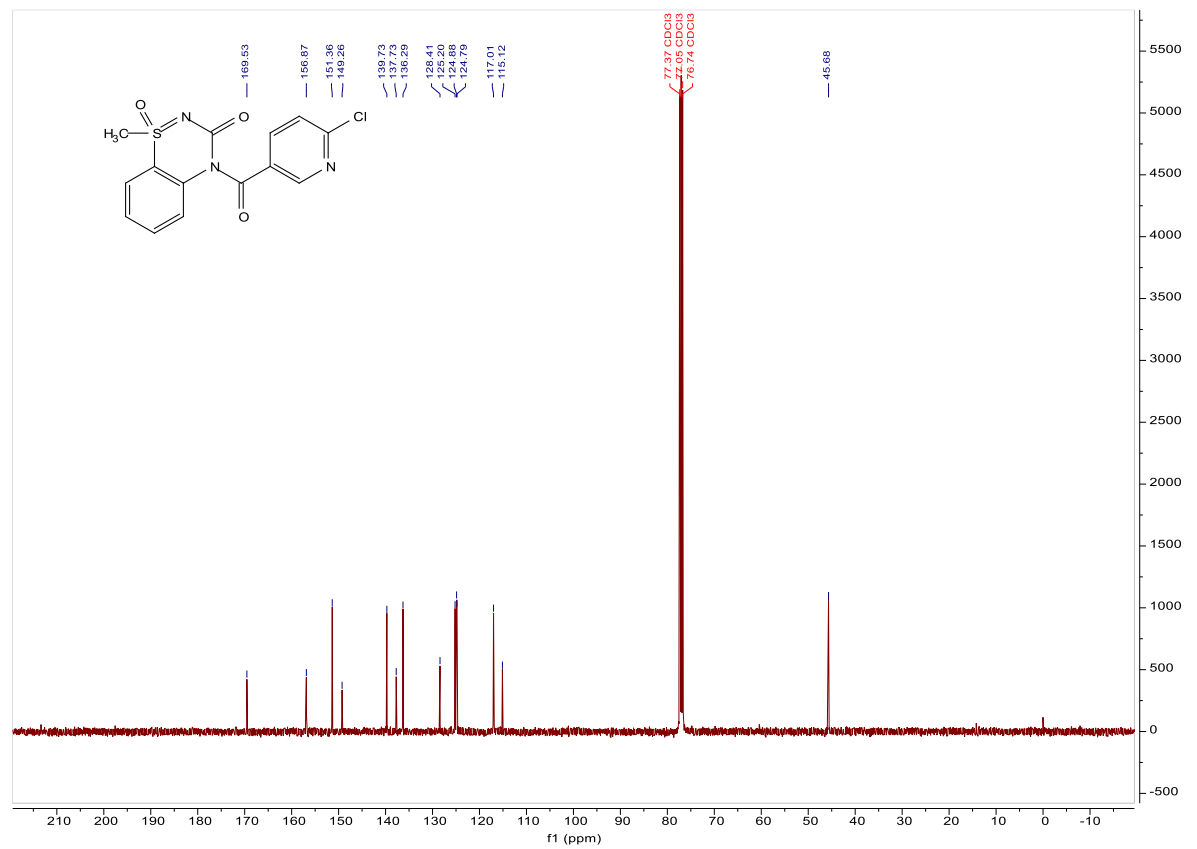

Figure S5.  $^1\text{H}$  and  $^{13}\text{C}$  NMR spectroscopy of **2e**

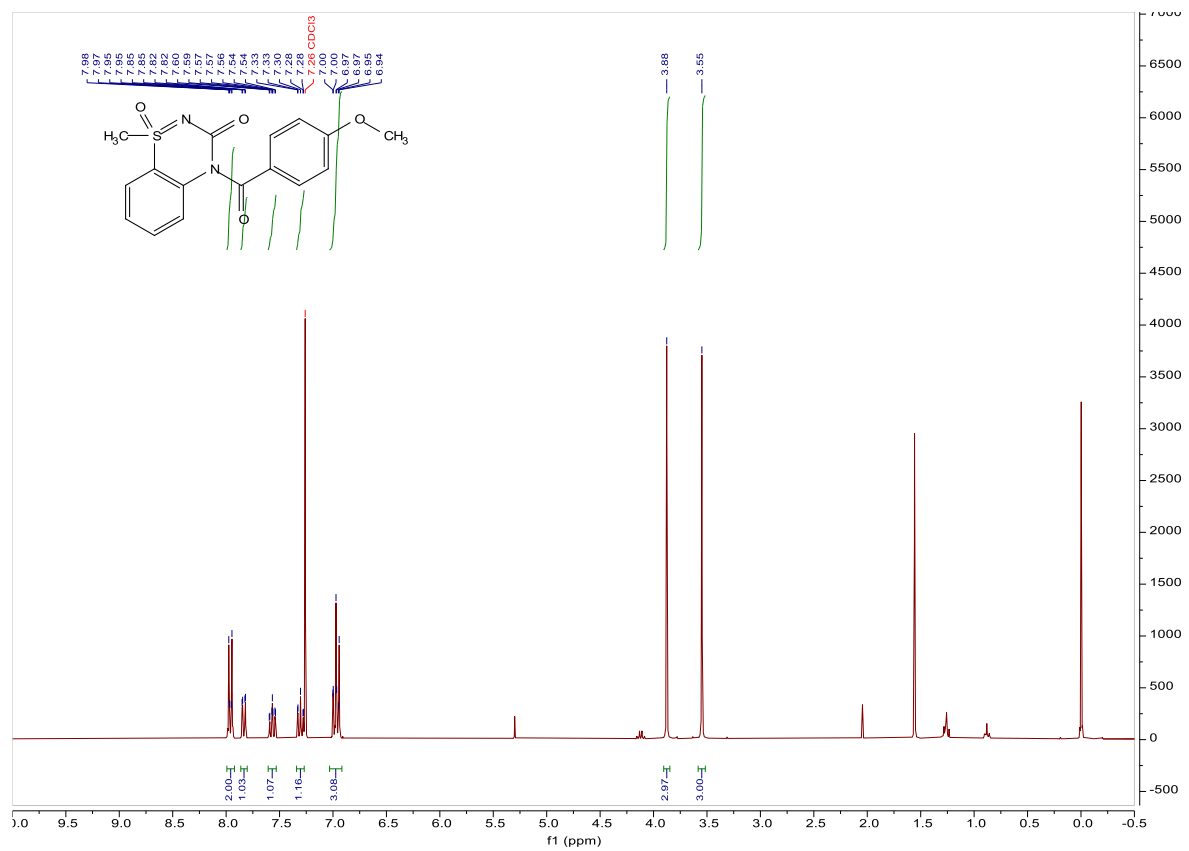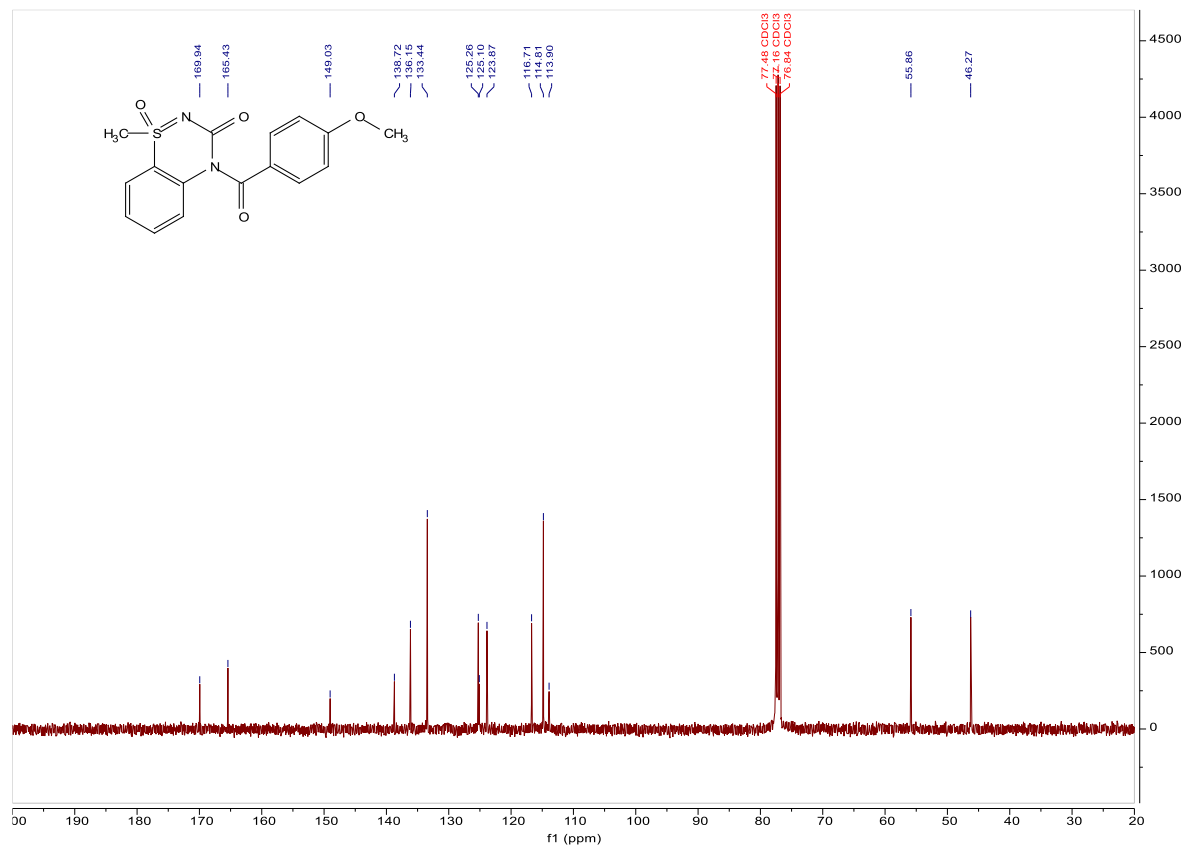

Figure S6. <sup>1</sup>H and <sup>13</sup>C NMR spectroscopy of **2b'**

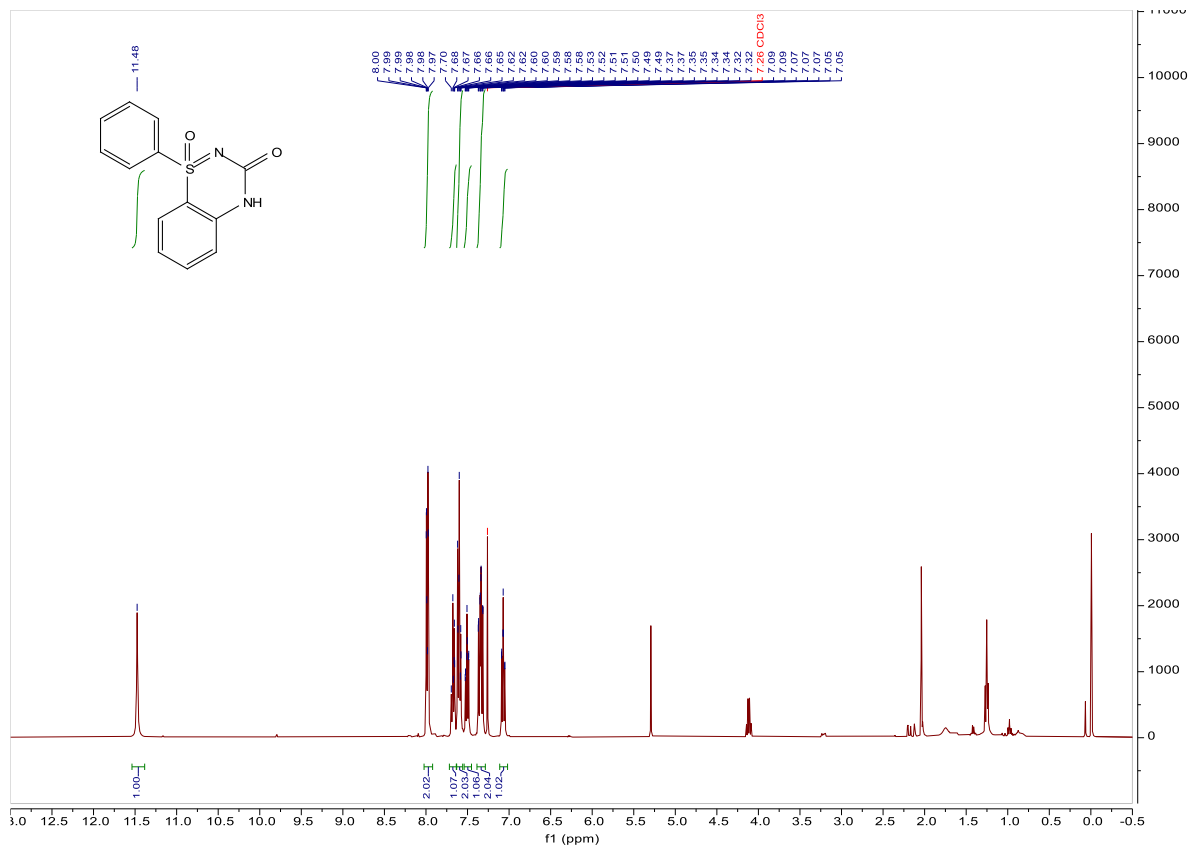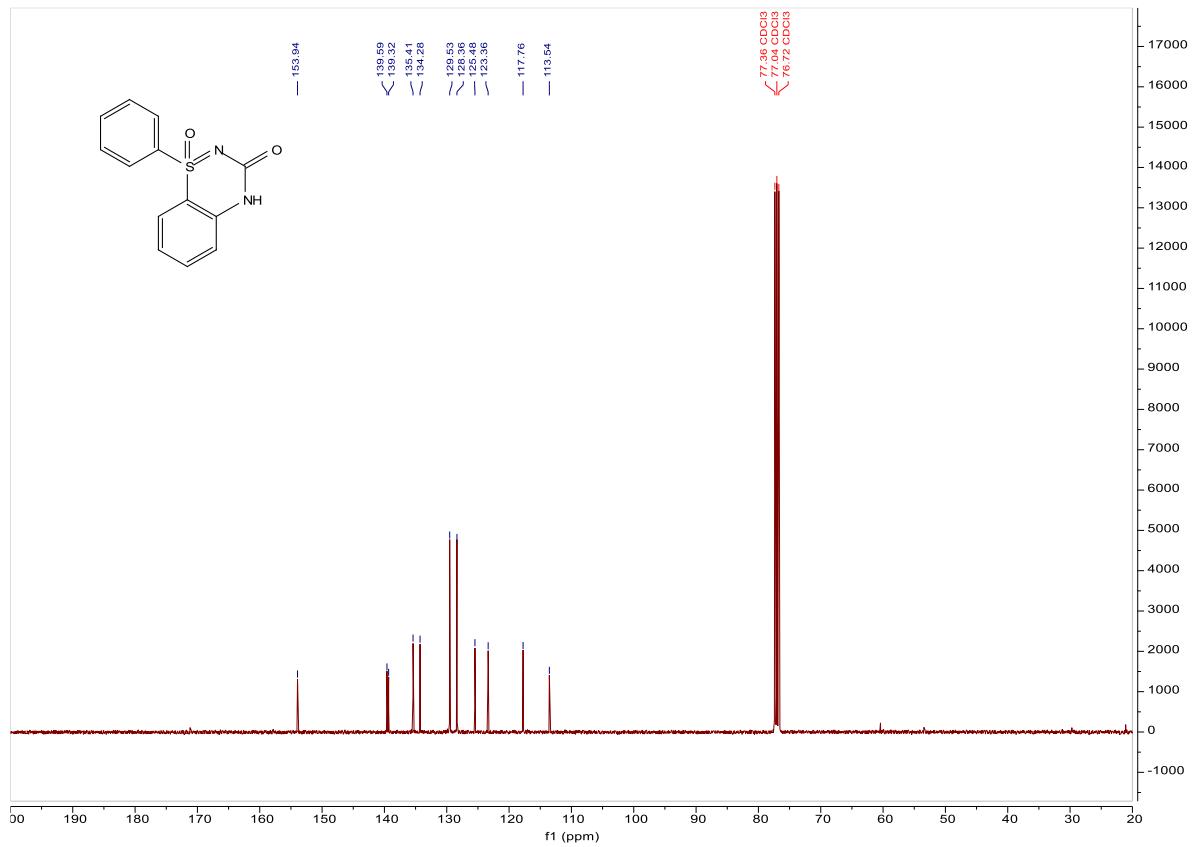

Figure S7.  $^1\text{H}$  and  $^{13}\text{C}$  NMR spectroscopy of sulfilimine of  $[^{13}\text{C}]\mathbf{1a}$

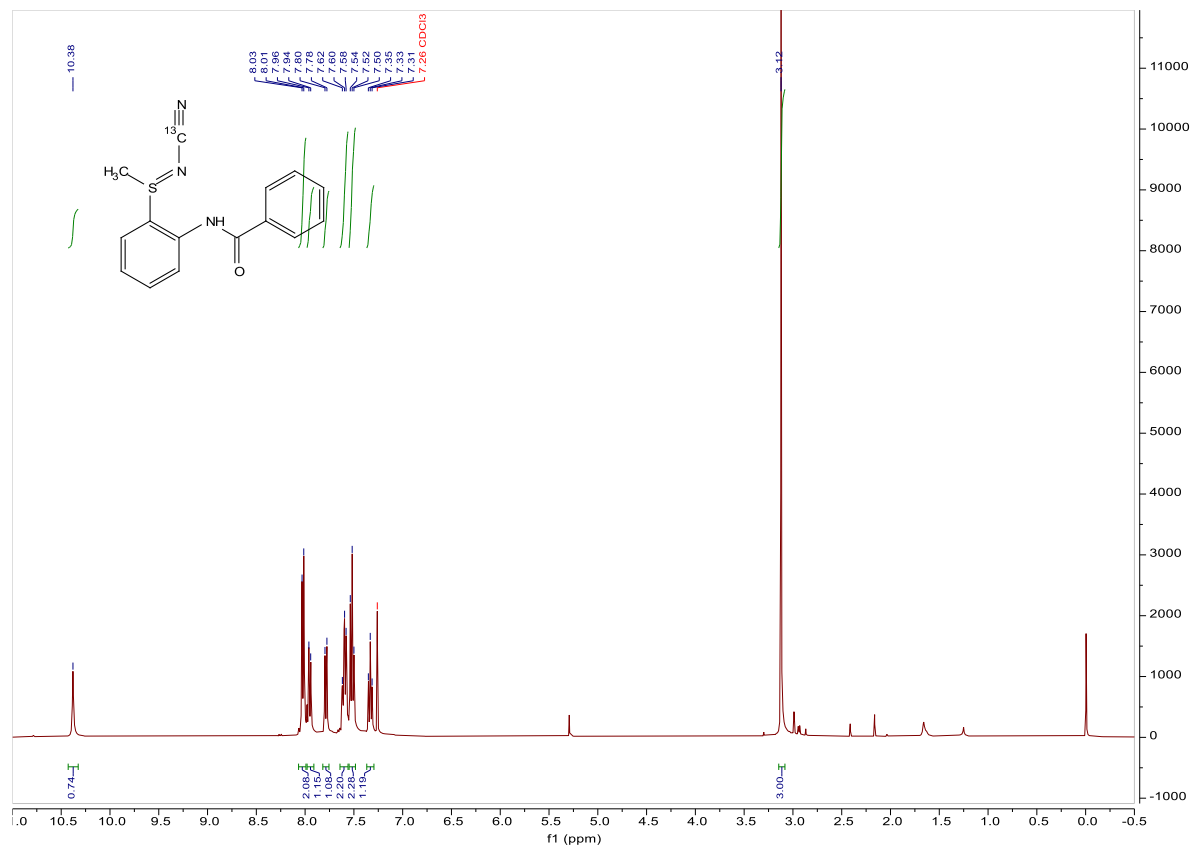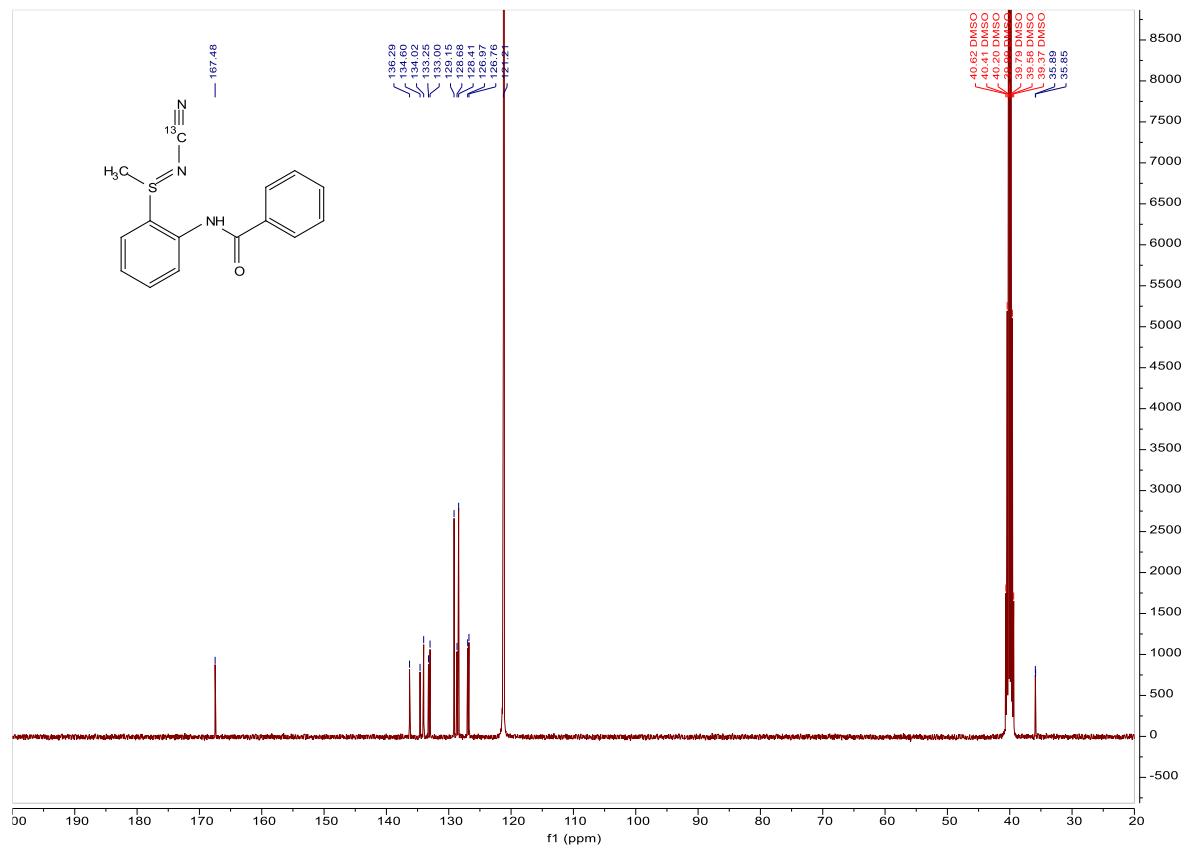



Figure S7-1.  $^1\text{H}$  and  $^{13}\text{C}$  NMR spectroscopy of  $[\text{C}^{13}]\mathbf{1a}$

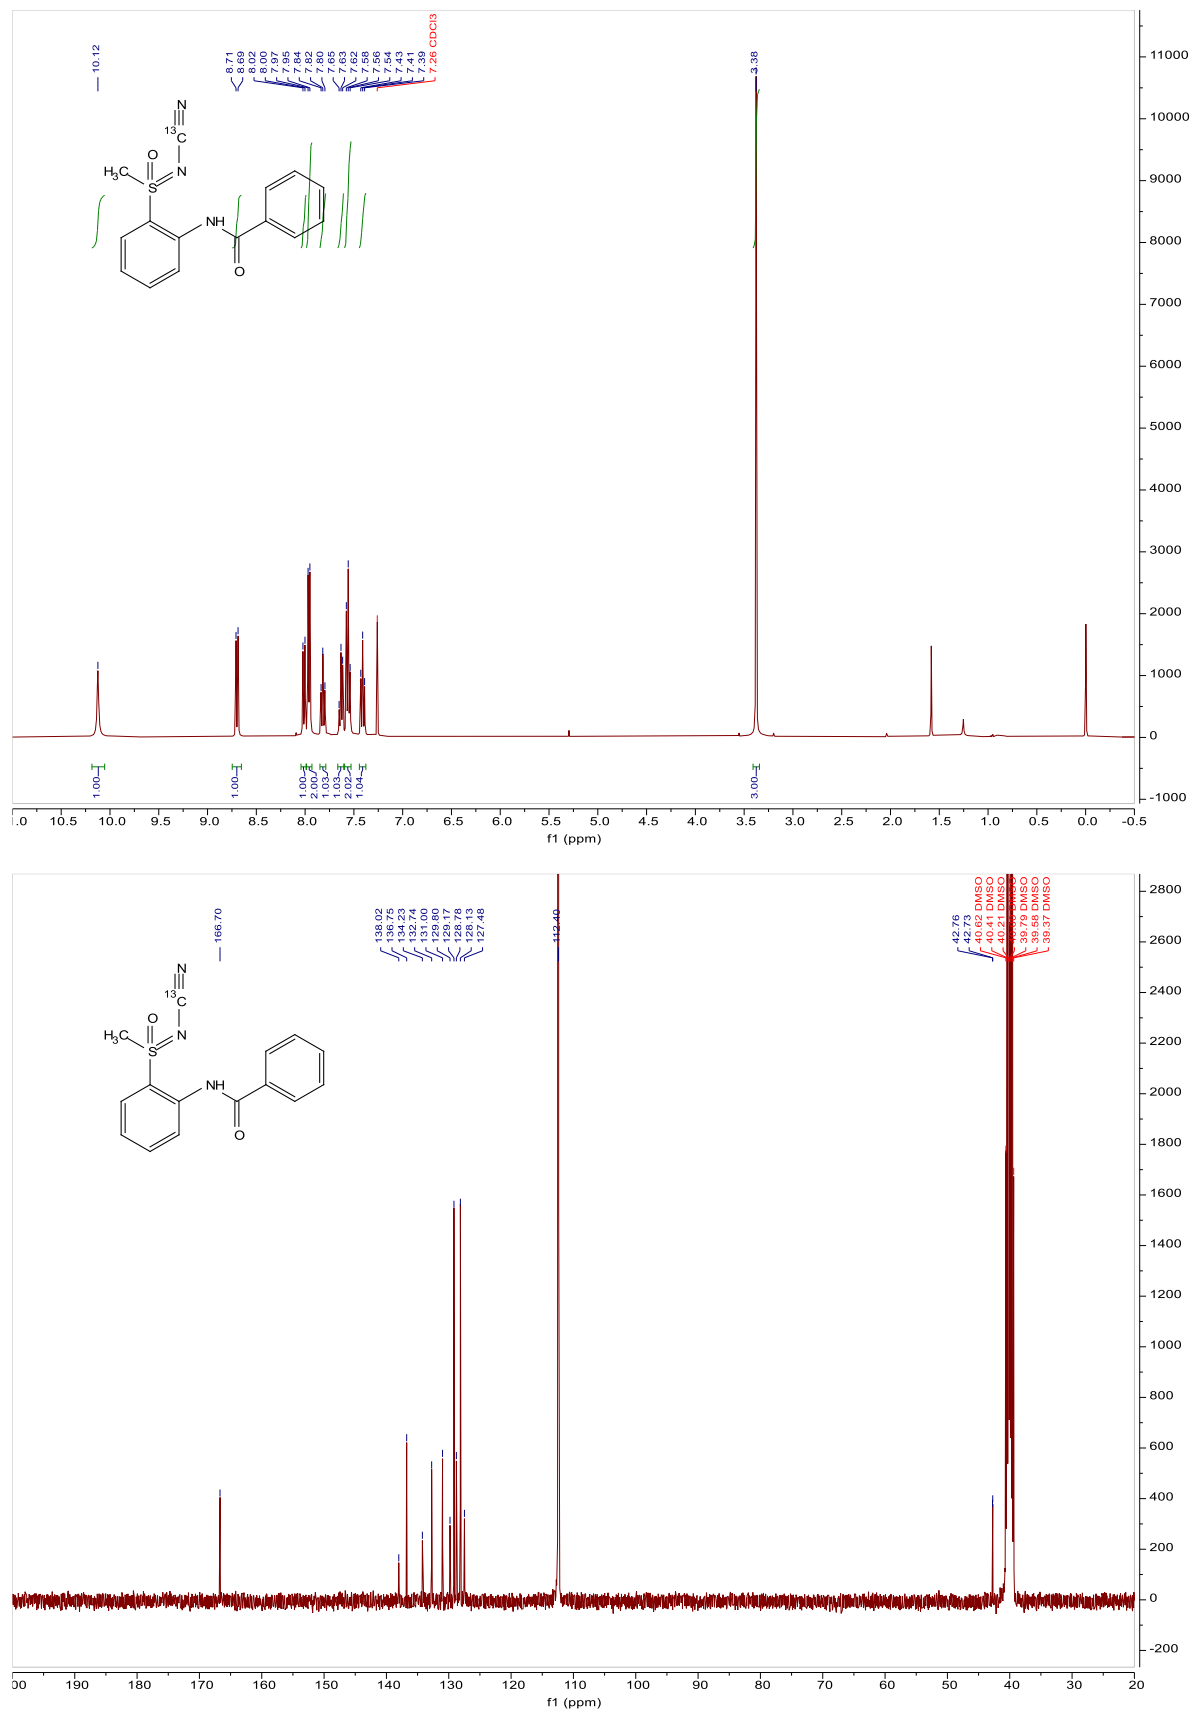

Figure S8.  $^1\text{H}$  and  $^{13}\text{C}$  NMR spectroscopy of  $^{13}\text{C}$ 2a

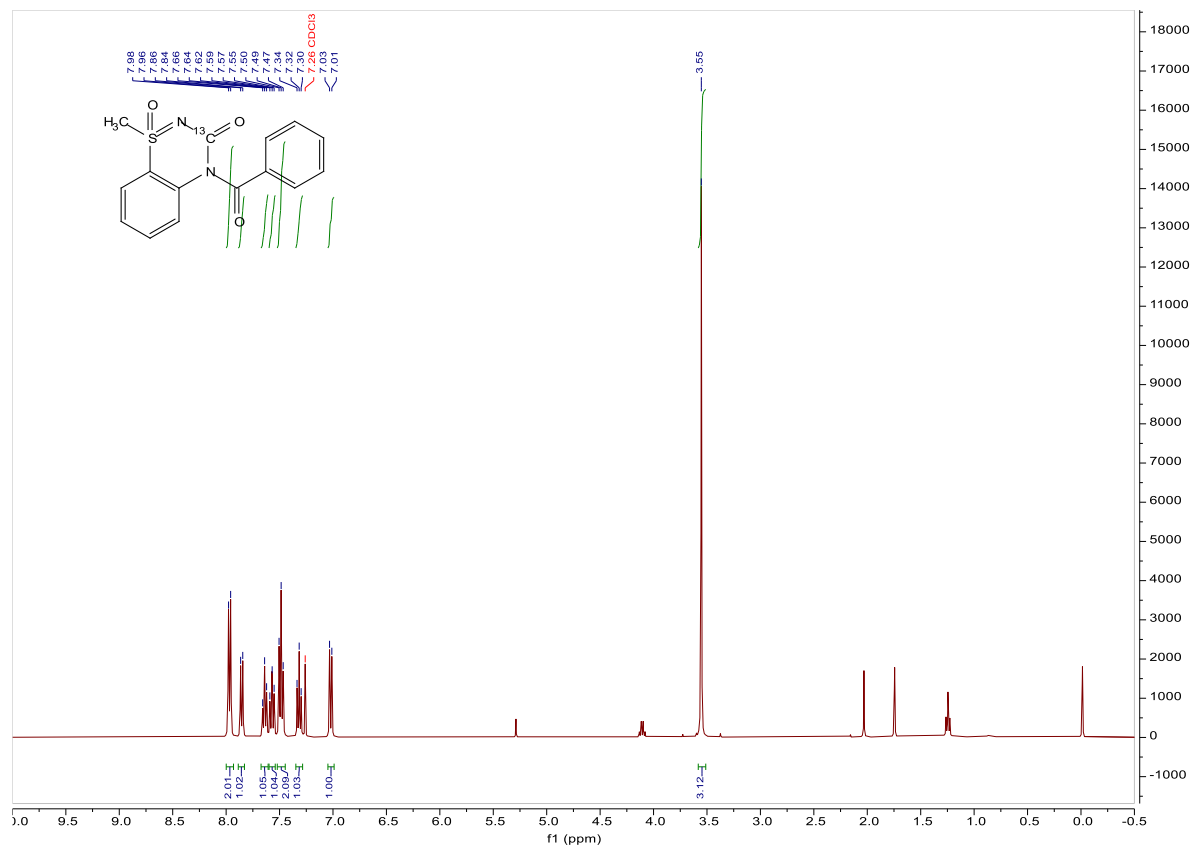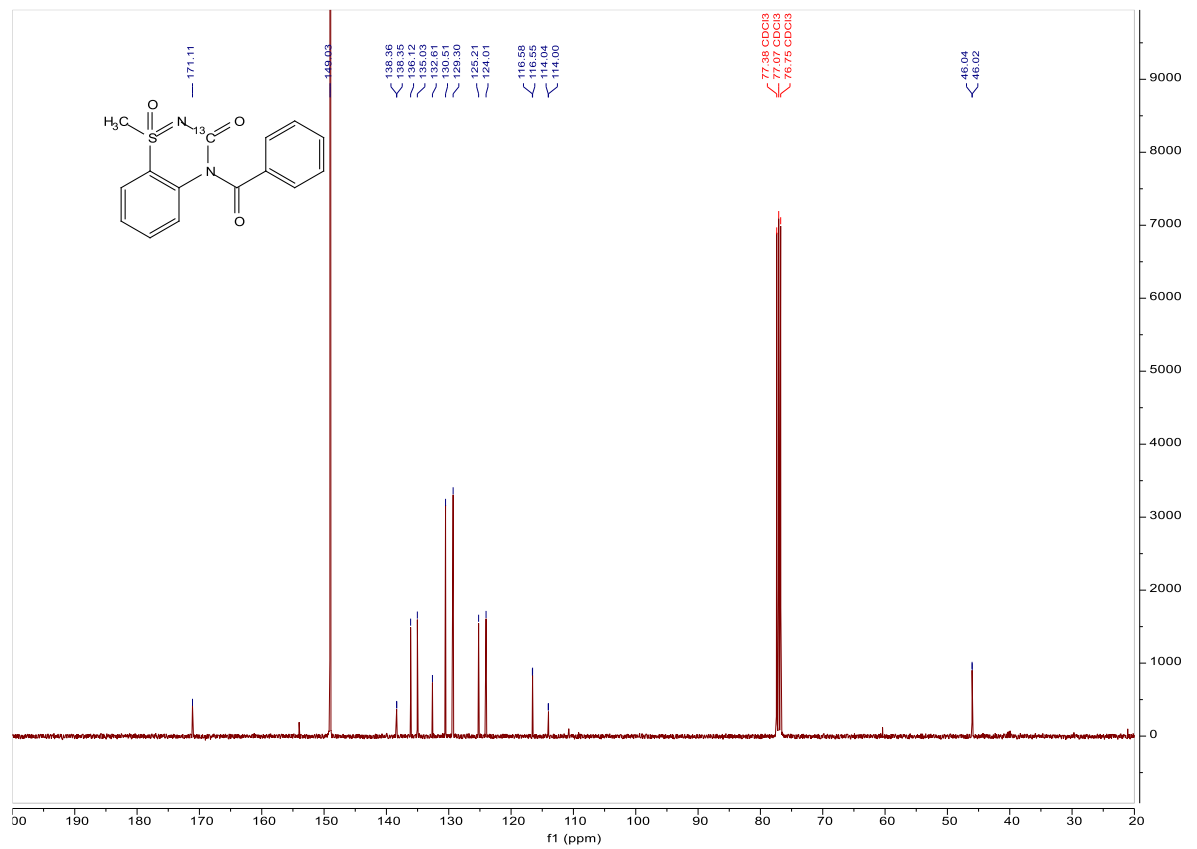

Figure S9. <sup>1</sup>H and <sup>13</sup>C NMR spectroscopy of **1ac**

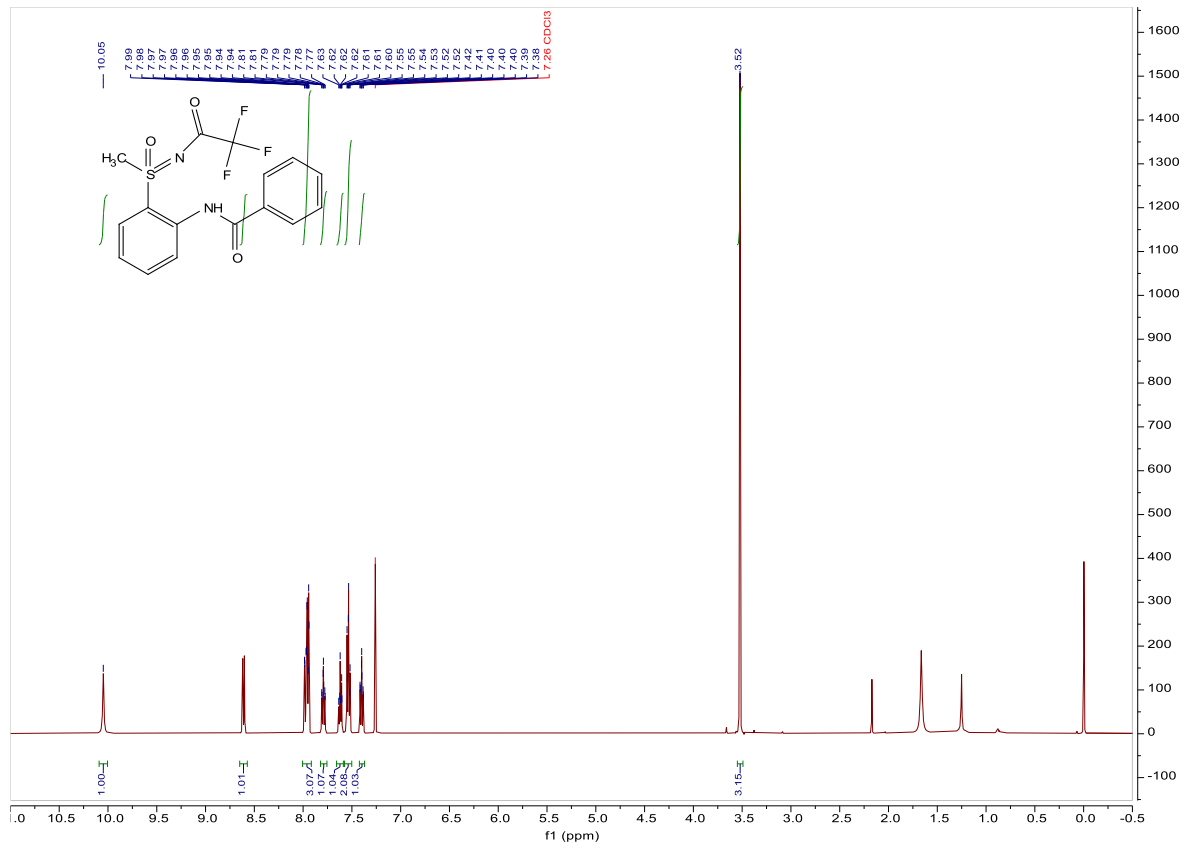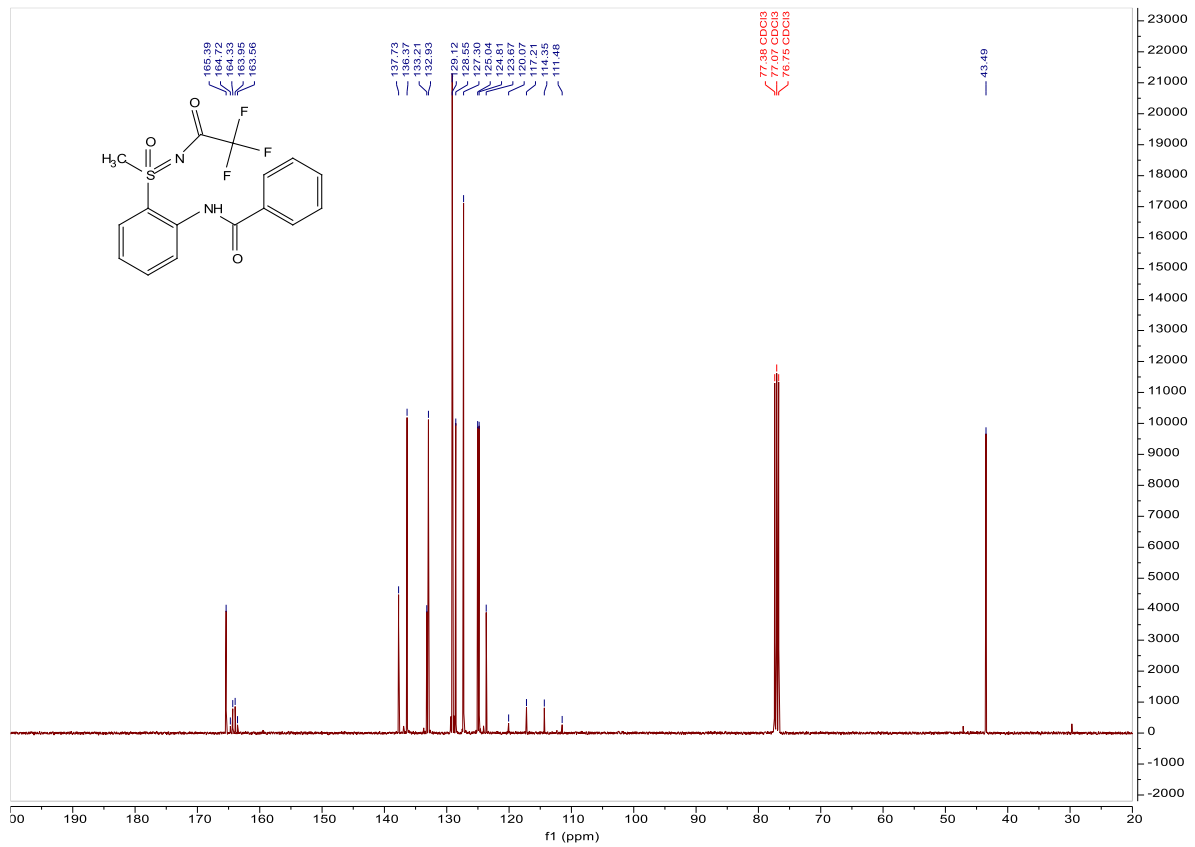

# Time-resolved NMR spectroscopy

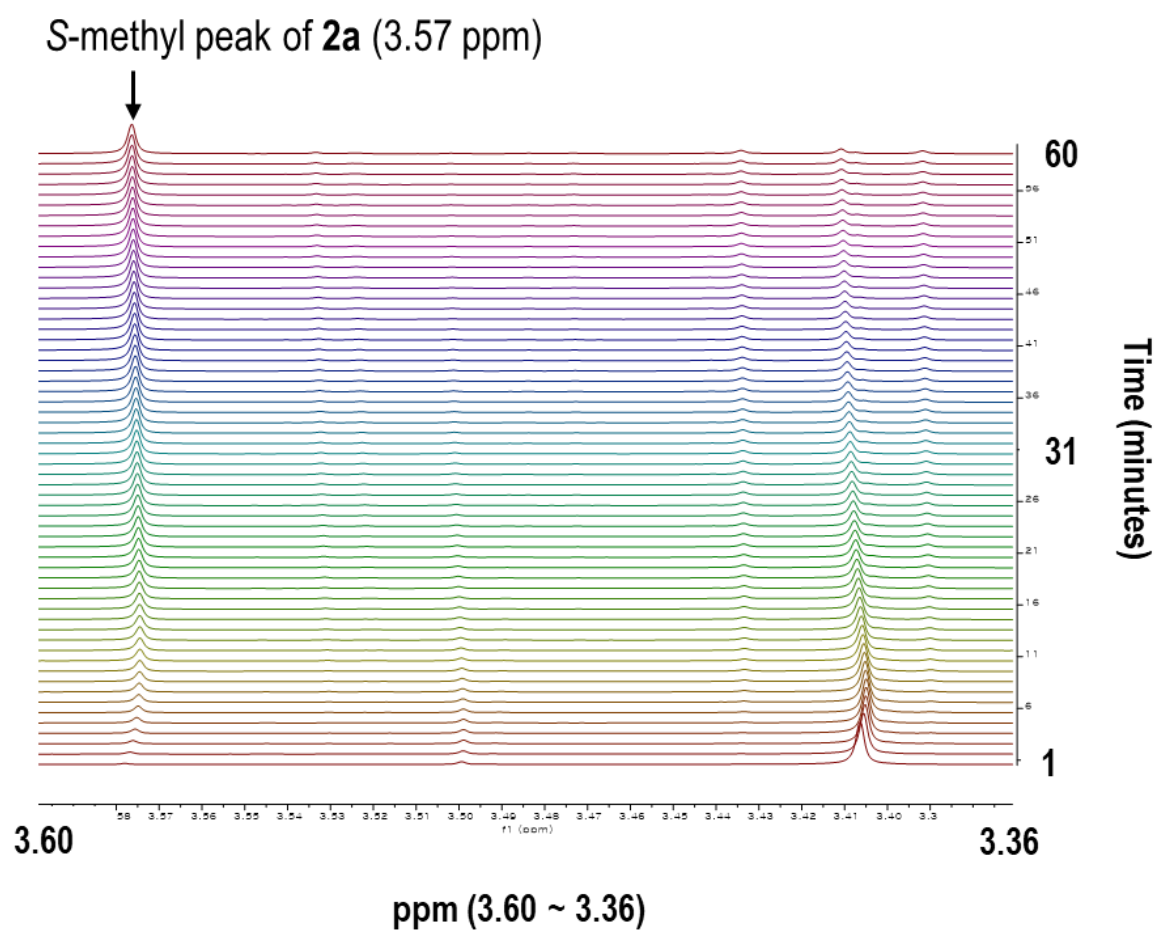

## LC/MS analyses of reaction intermediates **1ad**.

To a stirred solution of **1a** (50 mg, 1 equiv.) in  $\text{CH}_2\text{Cl}_2$  (3 mL) trifluoroacetic anhydride (TFAA, 52.6 mg, 1.5 equiv.) was added at 0 °C. After stirring for 1 h at room temperature, the small portion of reaction mixture (3  $\mu\text{L}$ ) was aliquoted and diluted with HPLC grade  $\text{CH}_2\text{Cl}_2$  (3 mL). LC/MS analysis of reaction intermediates was performed under gradient of 5–100%  $\text{CH}_3\text{CN}$  (0.1% formic acid) in water (0.1% formic acid) over 8 min.

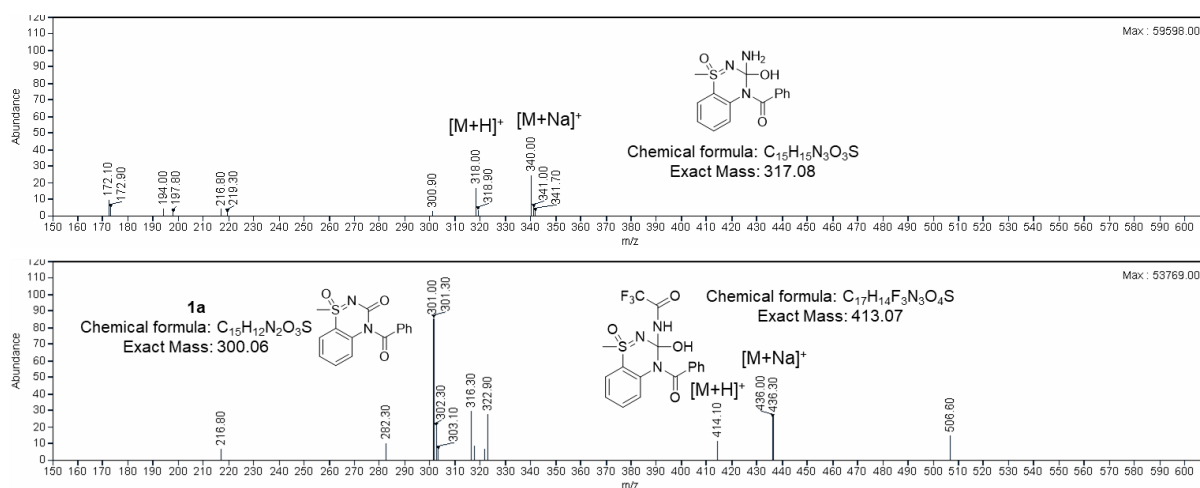

# Chemical Analysis Report for X-ray crystallography

## 1 Sample Information

---

|             |                  |
|-------------|------------------|
| Sample name | 'OIS-S-2021-152' |
|-------------|------------------|

---

|                   |                           |
|-------------------|---------------------------|
| Empirical formula | $C_{13} H_{10} N_2 O_2 S$ |
|-------------------|---------------------------|

|                |        |
|----------------|--------|
| Formula weight | 258.29 |
|----------------|--------|

---

|               |        |
|---------------|--------|
| Crystal color | silver |
|---------------|--------|

|              |                                       |
|--------------|---------------------------------------|
| Crystal size | 0.240 x 0.200 x 0.180 mm <sup>3</sup> |
|--------------|---------------------------------------|

|               |       |
|---------------|-------|
| Crystal shape | block |
|---------------|-------|

Crystal image

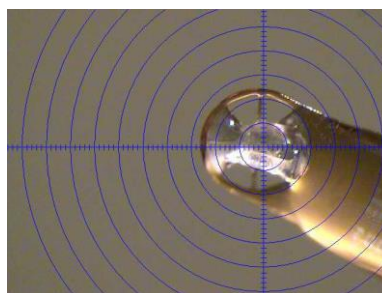

## 2 Instrument Information

### 2.1 Instrument

---

|                      |                      |
|----------------------|----------------------|
| Instrument and model | Bruker SMART APEX-II |
|----------------------|----------------------|

---

|                                 |                                                |
|---------------------------------|------------------------------------------------|
| Source                          | Mo K $\alpha$ ( $\lambda= 0.71073\text{\AA}$ ) |
| Operation voltage / current     | 50kV/30mA                                      |
| Monochromator                   | Graphite crystal                               |
| Detector                        | Charge-Coupled Device (CCD)                    |
| Exposure time                   | 10 sec/picture                                 |
| Operating temperature           | Low Temperature 100(1) K                       |
| Theta range for data collection | 2.530 to 30.507                                |
| Total data collection time      | 14hr                                           |

---

### 2.2 Software

---

|                       |                                 |
|-----------------------|---------------------------------|
| Data collection       | Bruker APEX II                  |
| Cell refinement       | Bruker SAINT                    |
| Data reduction        | Bruker SAINT                    |
| Absorption correction | SADABS-2016/2                   |
| Solve structure       | SHELXT 2018/2 (Sheldrick, 2018) |
| Refine structure      | SHELXL-2018/3 (Sheldrick, 2018) |
| Molecular graphics    | XP                              |

---

### 3 X-ray Crystallographic Results

#### 3.1 X-ray Crystallographic Data

##### 3.1.1 Crystal data and structure refinement for 'OIS-S-2021-152'.

---

|                                   |                                                                                               |
|-----------------------------------|-----------------------------------------------------------------------------------------------|
| Identification code               | 20220501LT_0m                                                                                 |
| Empirical formula                 | C13 H10 N2 O2 S                                                                               |
| Formula weight                    | 258.29                                                                                        |
| Temperature                       | 100(1) K                                                                                      |
| Wavelength                        | 0.71073 Å                                                                                     |
| Crystal system                    | Orthorhombic                                                                                  |
| Space group                       | Pna21                                                                                         |
| Unit cell dimensions              | a = 8.3198(2) Å      α = 90°<br>b = 9.8246(2) Å      β = 90°<br>c = 14.0426(3) Å      γ = 90° |
| Volume                            | 1147.82(4) Å <sup>3</sup>                                                                     |
| Z                                 | 4                                                                                             |
| Density (calculated)              | 1.495 Mg/m <sup>3</sup>                                                                       |
| Absorption coefficient            | 0.276 mm <sup>-1</sup>                                                                        |
| F(000)                            | 536                                                                                           |
| Crystal size                      | 0.240 x 0.200 x 0.180 mm <sup>3</sup>                                                         |
| Theta range for data collection   | 2.530 to 30.507°                                                                              |
| Index ranges                      | -11 ≤ h ≤ 9, -13 ≤ k ≤ 13, -19 ≤ l ≤ 18                                                       |
| Reflections collected             | 19508                                                                                         |
| Independent reflections           | 3293 [R(int) = 0.0227]                                                                        |
| Completeness to theta = 25.242°   | 100.0 %                                                                                       |
| Absorption correction             | Semi-empirical from equivalents                                                               |
| Max. and min. transmission        | 0.95 and 0.87                                                                                 |
| Refinement method                 | Full-matrix least-squares on F <sup>2</sup>                                                   |
| Data / restraints / parameters    | 3293 / 1 / 163                                                                                |
| Goodness-of-fit on F <sup>2</sup> | 1.034                                                                                         |
| Final R indices [I > 2σ(I)]       | R1 = 0.0287, wR2 = 0.0777                                                                     |
| R indices (all data)              | R1 = 0.0293, wR2 = 0.0780                                                                     |
| Absolute structure parameter      | -0.003(15)                                                                                    |



Extinction coefficient

n/a

Largest diff. peak and hole

0.389 and -0.249 e.Å<sup>-3</sup>

---

**3.1.2 Atomic coordinates ( $\times 10^4$ ) and equivalent isotropic displacement parameters ( $\text{\AA}^2 \times 10^3$ ) for 'OIS-S-2021-152'.**

**U(eq) is defined as one third of the trace of the orthogonalized  $U^{\text{ij}}$  tensor**

---

|       | x       | y       | z       | U(eq) |
|-------|---------|---------|---------|-------|
| S(1)  | 1959(1) | 4599(1) | 4624(1) | 13(1) |
| O(1)  | 1024(2) | 5821(1) | 4458(1) | 18(1) |
| O(2)  | 2603(2) | 2396(2) | 2527(1) | 20(1) |
| N(1)  | 1807(2) | 3437(2) | 3886(1) | 18(1) |
| N(2)  | 4419(2) | 3788(2) | 3231(1) | 16(1) |
| C(1)  | 2926(2) | 3181(2) | 3185(1) | 15(1) |
| C(2)  | 4973(2) | 4599(2) | 3972(1) | 14(1) |
| C(3)  | 6575(2) | 5051(2) | 3978(2) | 18(1) |
| C(4)  | 7125(2) | 5860(2) | 4713(2) | 19(1) |
| C(5)  | 6120(2) | 6246(2) | 5470(2) | 19(1) |
| C(6)  | 4537(2) | 5837(2) | 5467(1) | 17(1) |
| C(7)  | 3973(2) | 5017(2) | 4717(1) | 14(1) |
| C(8)  | 1346(2) | 3905(2) | 5717(1) | 15(1) |
| C(9)  | 1644(3) | 2542(2) | 5927(2) | 20(1) |
| C(10) | 1175(3) | 2045(2) | 6812(2) | 24(1) |
| C(11) | 441(3)  | 2900(2) | 7471(2) | 24(1) |
| C(12) | 167(3)  | 4260(2) | 7252(2) | 23(1) |
| C(13) | 610(2)  | 4776(2) | 6372(2) | 19(1) |

---

### 3.1.3 Bond lengths [Å] and angles [°] for 'OIS-S-2021-152'.

---

|             |            |
|-------------|------------|
| S(1)-O(1)   | 1.4490(14) |
| S(1)-N(1)   | 1.5470(18) |
| S(1)-C(7)   | 1.7298(17) |
| S(1)-C(8)   | 1.7552(19) |
| O(2)-C(1)   | 1.233(2)   |
| N(1)-C(1)   | 1.378(2)   |
| N(2)-C(1)   | 1.379(2)   |
| N(2)-C(2)   | 1.389(2)   |
| N(2)-H(2)   | 0.8800     |
| C(2)-C(7)   | 1.398(3)   |
| C(2)-C(3)   | 1.405(3)   |
| C(3)-C(4)   | 1.380(3)   |
| C(3)-H(3)   | 0.9500     |
| C(4)-C(5)   | 1.405(3)   |
| C(4)-H(4)   | 0.9500     |
| C(5)-C(6)   | 1.377(3)   |
| C(5)-H(5)   | 0.9500     |
| C(6)-C(7)   | 1.407(3)   |
| C(6)-H(6)   | 0.9500     |
| C(8)-C(9)   | 1.393(3)   |
| C(8)-C(13)  | 1.398(3)   |
| C(9)-C(10)  | 1.391(3)   |
| C(9)-H(9)   | 0.9500     |
| C(10)-C(11) | 1.392(3)   |
| C(10)-H(10) | 0.9500     |
| C(11)-C(12) | 1.390(3)   |
| C(11)-H(11) | 0.9500     |
| C(12)-C(13) | 1.386(3)   |
| C(12)-H(12) | 0.9500     |
| C(13)-H(13) | 0.9500     |

|                 |            |
|-----------------|------------|
| O(1)-S(1)-N(1)  | 117.39(9)  |
| O(1)-S(1)-C(7)  | 109.58(8)  |
| N(1)-S(1)-C(7)  | 107.73(9)  |
| O(1)-S(1)-C(8)  | 107.87(9)  |
| N(1)-S(1)-C(8)  | 105.97(9)  |
| C(7)-S(1)-C(8)  | 107.93(9)  |
| C(1)-N(1)-S(1)  | 123.92(14) |
| C(1)-N(2)-C(2)  | 125.55(16) |
| C(1)-N(2)-H(2)  | 117.2      |
| C(2)-N(2)-H(2)  | 117.2      |
| O(2)-C(1)-N(1)  | 120.16(17) |
| O(2)-C(1)-N(2)  | 120.07(17) |
| N(1)-C(1)-N(2)  | 119.76(17) |
| N(2)-C(2)-C(7)  | 122.08(17) |
| N(2)-C(2)-C(3)  | 120.06(17) |
| C(7)-C(2)-C(3)  | 117.84(17) |
| C(4)-C(3)-C(2)  | 120.10(18) |
| C(4)-C(3)-H(3)  | 120.0      |
| C(2)-C(3)-H(3)  | 120.0      |
| C(3)-C(4)-C(5)  | 121.59(17) |
| C(3)-C(4)-H(4)  | 119.2      |
| C(5)-C(4)-H(4)  | 119.2      |
| C(6)-C(5)-C(4)  | 119.21(18) |
| C(6)-C(5)-H(5)  | 120.4      |
| C(4)-C(5)-H(5)  | 120.4      |
| C(5)-C(6)-C(7)  | 119.23(18) |
| C(5)-C(6)-H(6)  | 120.4      |
| C(7)-C(6)-H(6)  | 120.4      |
| C(2)-C(7)-C(6)  | 122.00(16) |
| C(2)-C(7)-S(1)  | 116.78(14) |
| C(6)-C(7)-S(1)  | 121.01(14) |
| C(9)-C(8)-C(13) | 121.83(17) |
| C(9)-C(8)-S(1)  | 120.46(15) |

|                   |            |
|-------------------|------------|
| C(13)-C(8)-S(1)   | 117.67(15) |
| C(10)-C(9)-C(8)   | 118.45(19) |
| C(10)-C(9)-H(9)   | 120.8      |
| C(8)-C(9)-H(9)    | 120.8      |
| C(9)-C(10)-C(11)  | 120.4(2)   |
| C(9)-C(10)-H(10)  | 119.8      |
| C(11)-C(10)-H(10) | 119.8      |
| C(12)-C(11)-C(10) | 120.3(2)   |
| C(12)-C(11)-H(11) | 119.8      |
| C(10)-C(11)-H(11) | 119.8      |
| C(13)-C(12)-C(11) | 120.4(2)   |
| C(13)-C(12)-H(12) | 119.8      |
| C(11)-C(12)-H(12) | 119.8      |
| C(12)-C(13)-C(8)  | 118.61(19) |
| C(12)-C(13)-H(13) | 120.7      |
| C(8)-C(13)-H(13)  | 120.7      |

---

Symmetry transformations used to generate equivalent atoms:

### 3.1.4 Anisotropic displacement parameters ( $\text{\AA}^2 \times 10^3$ ) for 'OIS-S-2021-152'.

The anisotropic displacement factor exponent takes the form:  $-2\pi^2[h^2a^{*2}U^{11} + \dots + 2hka^*b^*U^{12}]$

|       | $U^{11}$ | $U^{22}$ | $U^{33}$ | $U^{23}$ | $U^{13}$ | $U^{12}$ |
|-------|----------|----------|----------|----------|----------|----------|
| S(1)  | 13(1)    | 16(1)    | 11(1)    | -1(1)    | 0(1)     | 0(1)     |
| O(1)  | 16(1)    | 20(1)    | 19(1)    | 1(1)     | -1(1)    | 3(1)     |
| O(2)  | 27(1)    | 19(1)    | 13(1)    | -4(1)    | 2(1)     | -4(1)    |
| N(1)  | 17(1)    | 22(1)    | 15(1)    | -4(1)    | 0(1)     | -2(1)    |
| N(2)  | 17(1)    | 18(1)    | 13(1)    | -2(1)    | 2(1)     | 1(1)     |
| C(1)  | 19(1)    | 13(1)    | 12(1)    | 2(1)     | 0(1)     | 0(1)     |
| C(2)  | 16(1)    | 11(1)    | 14(1)    | 1(1)     | 0(1)     | 2(1)     |
| C(3)  | 15(1)    | 18(1)    | 21(1)    | 1(1)     | 2(1)     | 0(1)     |
| C(4)  | 15(1)    | 18(1)    | 25(1)    | 1(1)     | -1(1)    | -2(1)    |
| C(5)  | 20(1)    | 18(1)    | 20(1)    | -1(1)    | -3(1)    | -1(1)    |
| C(6)  | 20(1)    | 16(1)    | 16(1)    | -1(1)    | -1(1)    | 0(1)     |
| C(7)  | 12(1)    | 16(1)    | 13(1)    | 2(1)     | 0(1)     | -1(1)    |
| C(8)  | 14(1)    | 18(1)    | 13(1)    | 0(1)     | 2(1)     | -2(1)    |
| C(9)  | 26(1)    | 17(1)    | 17(1)    | -2(1)    | 1(1)     | -1(1)    |
| C(10) | 31(1)    | 20(1)    | 20(1)    | 2(1)     | 1(1)     | -2(1)    |
| C(11) | 26(1)    | 30(1)    | 17(1)    | 0(1)     | 2(1)     | -7(1)    |
| C(12) | 24(1)    | 28(1)    | 16(1)    | -4(1)    | 5(1)     | -2(1)    |
| C(13) | 19(1)    | 22(1)    | 17(1)    | -3(1)    | 3(1)     | 0(1)     |

3.1.5 Hydrogen coordinates ( $\times 10^4$ ) and isotropic displacement parameters  $\text{\AA}^2 \times 10^3$  for 'OIS-S-2021-152'.

---

|       | x    | y    | z    | U(eq) |
|-------|------|------|------|-------|
| H(2)  | 5076 | 3650 | 2749 | 19    |
| H(3)  | 7281 | 4800 | 3476 | 22    |
| H(4)  | 8209 | 6163 | 4706 | 23    |
| H(5)  | 6528 | 6783 | 5979 | 23    |
| H(6)  | 3833 | 6106 | 5966 | 21    |
| H(9)  | 2156 | 1965 | 5476 | 24    |
| H(10) | 1357 | 1116 | 6967 | 28    |
| H(11) | 126  | 2553 | 8075 | 29    |
| H(12) | -328 | 4839 | 7708 | 27    |
| H(13) | 418  | 5703 | 6217 | 23    |

---

### 3.1.6 Torsion angles [°] for 'OIS-S-2021-152'.

---

|                      |             |
|----------------------|-------------|
| O(1)-S(1)-N(1)-C(1)  | 101.12(17)  |
| C(7)-S(1)-N(1)-C(1)  | -23.06(19)  |
| C(8)-S(1)-N(1)-C(1)  | -138.37(16) |
| S(1)-N(1)-C(1)-O(2)  | -167.62(15) |
| S(1)-N(1)-C(1)-N(2)  | 13.4(3)     |
| C(2)-N(2)-C(1)-O(2)  | -174.46(18) |
| C(2)-N(2)-C(1)-N(1)  | 4.5(3)      |
| C(1)-N(2)-C(2)-C(7)  | -7.7(3)     |
| C(1)-N(2)-C(2)-C(3)  | 173.80(18)  |
| N(2)-C(2)-C(3)-C(4)  | 179.81(18)  |
| C(7)-C(2)-C(3)-C(4)  | 1.2(3)      |
| C(2)-C(3)-C(4)-C(5)  | 0.4(3)      |
| C(3)-C(4)-C(5)-C(6)  | -1.7(3)     |
| C(4)-C(5)-C(6)-C(7)  | 1.4(3)      |
| N(2)-C(2)-C(7)-C(6)  | 179.92(17)  |
| C(3)-C(2)-C(7)-C(6)  | -1.5(3)     |
| N(2)-C(2)-C(7)-S(1)  | -5.3(2)     |
| C(3)-C(2)-C(7)-S(1)  | 173.23(14)  |
| C(5)-C(6)-C(7)-C(2)  | 0.2(3)      |
| C(5)-C(6)-C(7)-S(1)  | -174.33(14) |
| O(1)-S(1)-C(7)-C(2)  | -110.28(15) |
| N(1)-S(1)-C(7)-C(2)  | 18.50(17)   |
| C(8)-S(1)-C(7)-C(2)  | 132.51(15)  |
| O(1)-S(1)-C(7)-C(6)  | 64.52(17)   |
| N(1)-S(1)-C(7)-C(6)  | -166.71(16) |
| C(8)-S(1)-C(7)-C(6)  | -52.69(18)  |
| O(1)-S(1)-C(8)-C(9)  | 159.83(16)  |
| N(1)-S(1)-C(8)-C(9)  | 33.32(19)   |
| C(7)-S(1)-C(8)-C(9)  | -81.86(18)  |
| O(1)-S(1)-C(8)-C(13) | -22.43(17)  |
| N(1)-S(1)-C(8)-C(13) | -148.94(15) |



|                         |             |
|-------------------------|-------------|
| C(7)-S(1)-C(8)-C(13)    | 95.88(16)   |
| C(13)-C(8)-C(9)-C(10)   | 0.7(3)      |
| S(1)-C(8)-C(9)-C(10)    | 178.32(16)  |
| C(8)-C(9)-C(10)-C(11)   | -0.7(3)     |
| C(9)-C(10)-C(11)-C(12)  | 0.1(3)      |
| C(10)-C(11)-C(12)-C(13) | 0.5(3)      |
| C(11)-C(12)-C(13)-C(8)  | -0.4(3)     |
| C(9)-C(8)-C(13)-C(12)   | -0.1(3)     |
| S(1)-C(8)-C(13)-C(12)   | -177.83(15) |

---

Symmetry transformations used to generate equivalent atoms:

### 3.1.7 Hydrogen bonds [ $\text{\AA}$ and $^\circ$ ] for 'OIS-S-2021-152'.

---

| D-H... $\text{\AA}$ | d(D-H) | d(H... $\text{\AA}$ ) | d(D... $\text{\AA}$ ) | $\angle(\text{DH}\text{\AA})$ |
|---------------------|--------|-----------------------|-----------------------|-------------------------------|
| N(2)-H(2)...O(2)#1  | 0.88   | 2.36                  | 3.058(2)              | 136.2                         |
| C(3)-H(3)...O(2)#1  | 0.95   | 2.55                  | 3.266(3)              | 132.3                         |

---

Symmetry transformations used to generate equivalent atoms:

#1  $x+1/2, -y+1/2, z$

## 3.2 X-ray Crystallographic Structure.

### 3.2.1 Crystal structure.

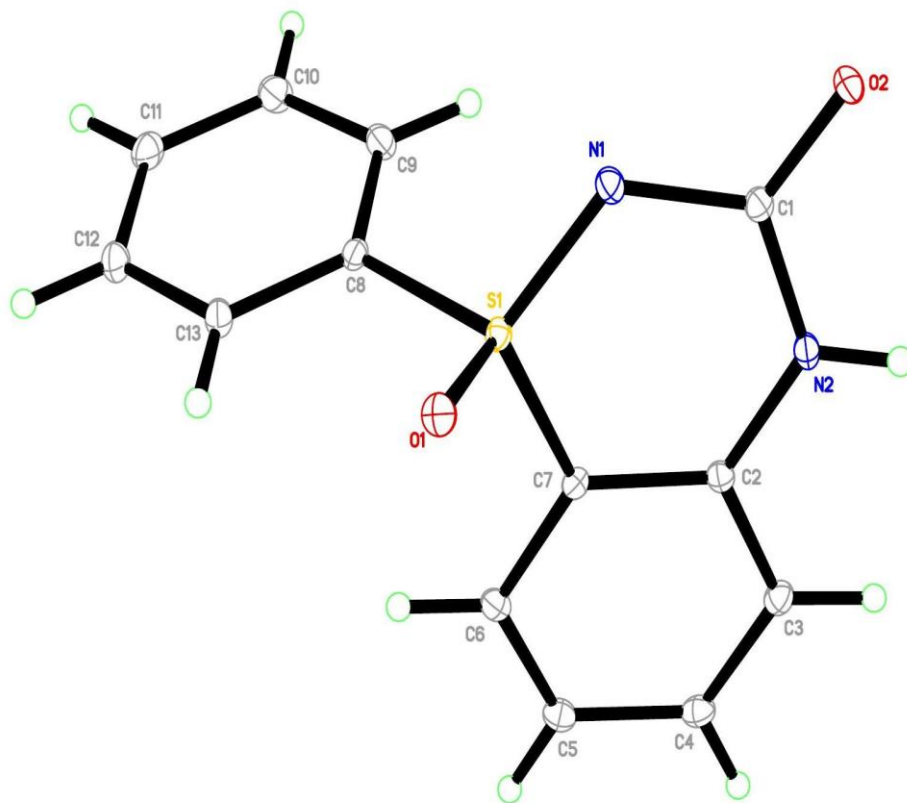

Figure 1. Crystal structure of 'OIS-S-2021-152'. Thermal ellipsoids for non-H atoms are shown at the 25% probability level.

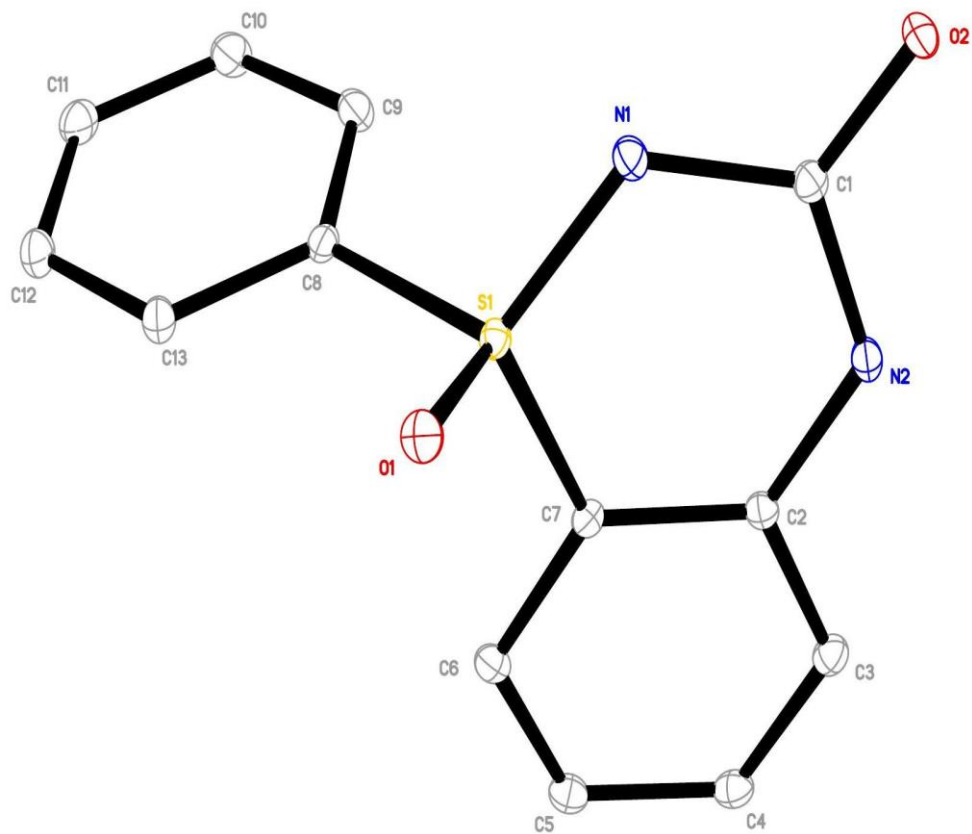

Figure 2. Crystal structure of 'OIS-S-2021-152'. Thermal ellipsoids for non-H atoms are shown at the 25% probability level. For clarity, hydrogen atoms are omitted.

### 3.2.2 Packing crystal structure.

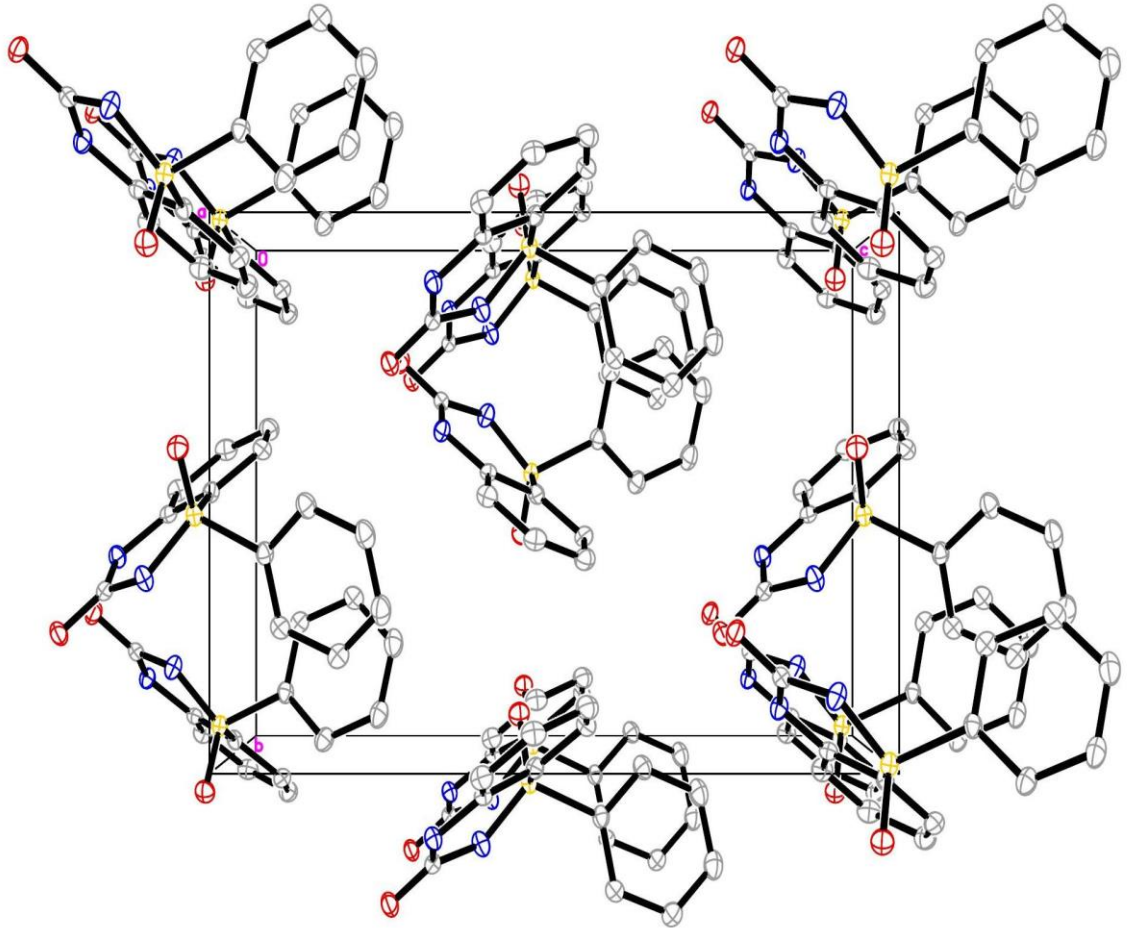

Figure 3. The packing crystal structure showing the view along the a axis.

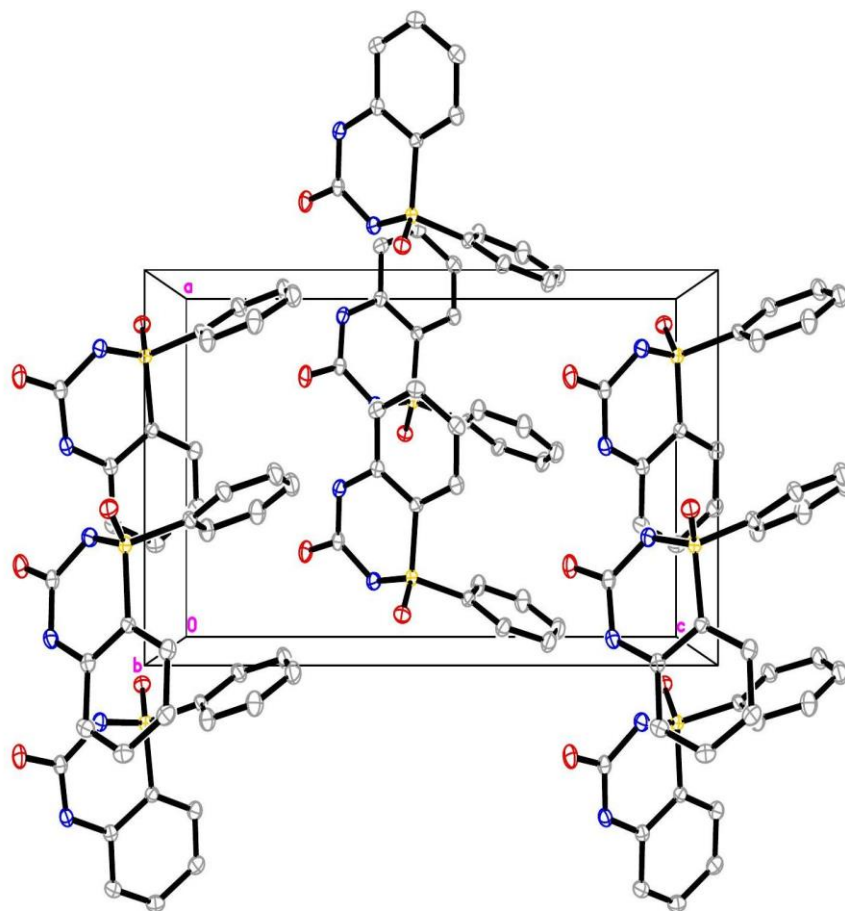

Figure 4. The packing crystal structure showing the view along the b axis.

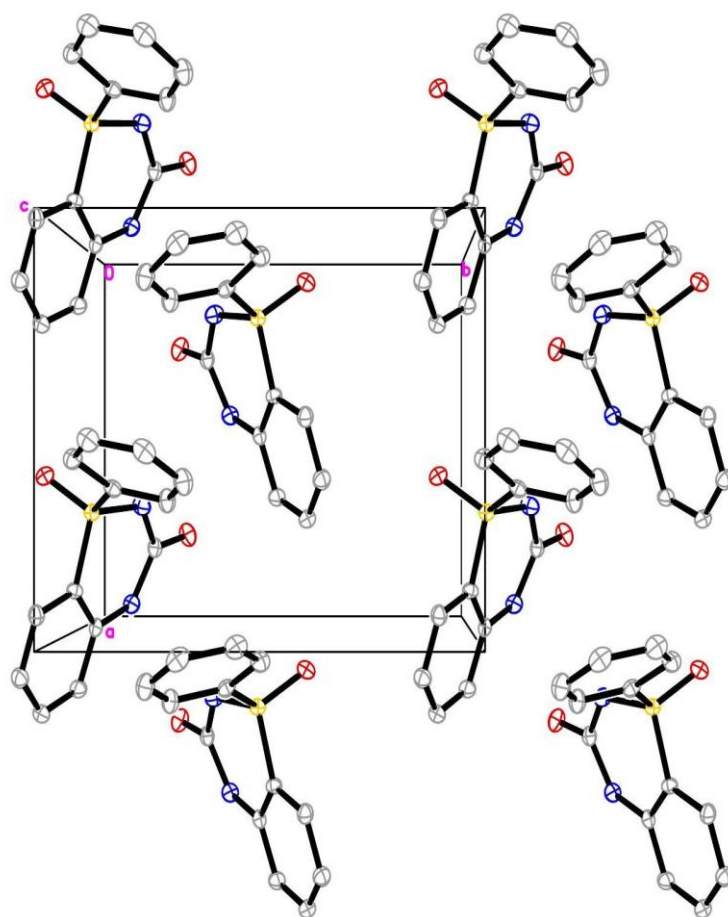

Figure 5. The packing crystal structure showing the view along the c axis.

# The ADMET predicted data of compound **2c** and **2d** by the KRICT AI platform

23. 6. 16. 오후 6:15

KRICT AI Platform

KRICT

LOGOUT

MENU

## My Job

[Job List](#)

[Result List](#)

## Module

[Module List](#)

## Result detail

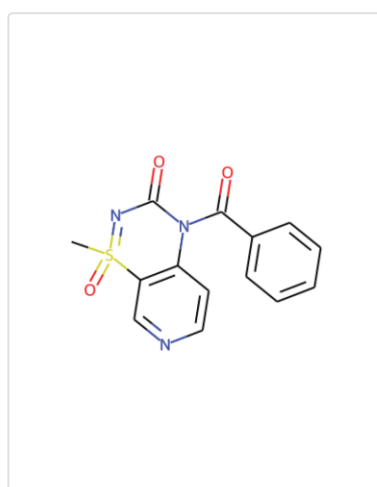

**Job Name** compound 2c **Running Time (sec)** 21.10

**Job Explanation** [empty]

**Register Date** 2023-06-16 PM 06:09 **Complete Date** 2023-06-16 PM 06:09

### SMILES Prediction Info

- O=C(N=S1(C)=O)N(C(C2=CC=CC=C2)=O)C3=C1C=NC=C3
- Molecular Weight: 301.052
- LogP: 2.319
- H-Bond Acceptor: 4
- H-Bond Donor: 0
- Rotatable Bond: 1
- QED (drug likeness): 0.809

### Result Download

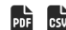

|   |                                                                                                                                             |
|---|---------------------------------------------------------------------------------------------------------------------------------------------|
| 1 | <b>Module</b> Cardiotoxicity<br><b>Result</b> hERG-nonblocker (graph: 0.0, descriptor: 0.0002, fingerprint: 0.0)<br><b>Elapsed time</b> 3.6 |
| 2 | <b>Module</b> BBB Permeability<br><b>Result</b> Permeable (0.9602)<br><b>Elapsed time</b> 1.7                                               |
| 3 | <b>Module</b> Cardiotoxicity v2.0<br><b>Result</b> hERG-nonblocker (0.0154)<br><b>Elapsed time</b> 10.8                                     |
| 4 | <b>Module</b> Metabolic stability<br><b>Result</b> Human: Stable (0.648)<br><b>Elapsed time</b> 1.8                                         |
| 5 | <b>Module</b> Hepatotoxicity<br><b>Result</b> Toxic (1.0)<br><b>Elapsed time</b> 1.1                                                        |



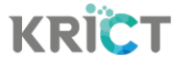

LOGOUT

MENU

Elapsed time 2.0

7

Module PredAOT  
Result Exception!

^  
TOP

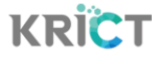

대전광역시 유성구 가정로 141 한국화학연구원  
Tel. 042) 860-7460  
E-mail. gyutae@kRICT.re.kr  
COPYRIGHT © KRICT. ALL RIGHTS RESERVED.

## My Job

[Job List](#)[Result List](#)

## Module

[Module List](#)

## Result detail

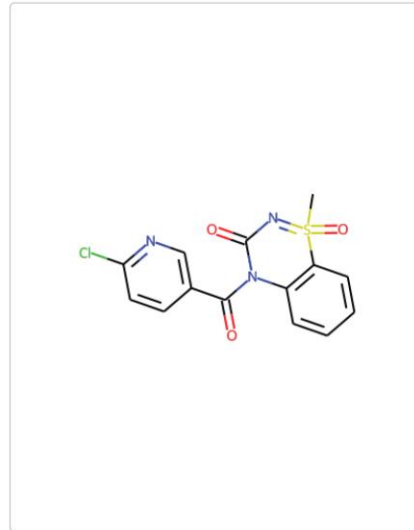

## Job Name

compound 2d

## Running Time (sec)

21.83

## Job Explanation

[empty]

## Register Date

2023-06-16 PM 06:11

## Complete Date

2023-06-16 PM 06:11

## SMILES Prediction Info

- O=S(C1=C2C=CC=C1)(C)=NC(N2C(C3=CN=C(C)C=C3)=O)=O
- Molecular Weight: 335.013
- LogP: 2.972
- H-Bond Acceptor: 4
- H-Bond Dornor: 0
- Rotatable Bond: 1
- QED (drug likeness): 0.750

## Result Download

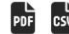

1

**Module** Cardiotoxicity**Result** hERG-nonblocker (graph: 0.0003, descriptor: 0.0008, fingerprint: 0.0001)**Elapsed time** 3.5

2

**Module** BBB Permeability**Result** Permeable (0.8368)**Elapsed time** 1.6

3

**Module** Cardiotoxicity v2.0**Result** hERG-nonblocker (0.0264)**Elapsed time** 11.3

4

**Module** Metabolic stability**Result** Human: Stable (0.618)**Elapsed time** 2.0

5

**Module** Hepatotoxicity**Result** Toxic (1.0)**Elapsed time** 1.2

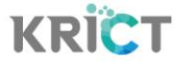

LOGOUT MENU

Elapsed time 2.0

7

Module PredAOT  
Result Exception!

TOP

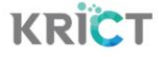

대전광역시 유성구 가정로 141 한국화학연구원  
Tel. 042) 860-7460  
E-mail. gyutae@kriict.re.kr  
COPYRIGHT © KRiCT. ALL RIGHTS RESERVED.
